1 **Title:** Frequency-tagging visual background information enables multi-target  
2 perceptual filling-in to be distinguished from phenomenally matched replay

3  
4  
5  
6  
7 **Author names and affiliations:** Matthew J Davidson<sup>1+</sup>, Irene Graafsma<sup>2</sup>, Naotsugu  
8 Tsuchiya<sup>1\*+</sup>, Jeroen van Boxtel<sup>1,3\*+</sup>

9  
10 <sup>1</sup> *School of Psychological Sciences, Monash University, Victoria, Australia.*

11 <sup>2</sup> *Psychology Department, University of Amsterdam.*

12 <sup>3</sup> *School of Psychology, Faculty of Health, University of Canberra, Canberra, Australia*

13  
14 \* Equal contribution

15 + Correspondence to:

16 Matthew Davidson, [matthew.davidson@monash.edu](mailto:matthew.davidson@monash.edu)

17 Naotsugu Tsuchiya, [naotsugu.tsuchiya@monash.edu](mailto:naotsugu.tsuchiya@monash.edu)

18 Jeroen van Boxtel, [j.j.a.vanboxtel@gmail.com](mailto:j.j.a.vanboxtel@gmail.com)

19  
20  
21  
22  
23  
24  
25  
26  
27  
28  
29  
30  
31  
32  
33 **Conflict of Interest:** The authors declare no competing financial interests.

34  
35 **Acknowledgements:** MJD was supported by an Australian Government Research Training  
36 Program Scholarship and by an Australian Research Council (ARC) Discovery Project (DP)  
37 (DP180104128). NT was funded by an ARC Future Fellowship (FT120100619) and DPs  
38 (DP130100194, DP180100396, and DP180104128).

39  
40 **Author contributions:** MJD, NT, and JVB designed the research. MJD and IG piloted the  
41 experiment, IG collected the data. MJD performed the analyses and wrote the first draft of the  
42 manuscript. All authors reviewed and contributed to the final manuscript. We thank Chunkai  
43 Qiu for help in pilot experimentation and analysis.

44  
45  
46  
47  
48  
49  
50  
51  
52  
53  
54  
55  
56  
57  
58  
59  
60  
61  
62  
63  
64  
65  
66  
67  
68  
69  
70  
71  
72  
73  
74  
75  
76  
77  
78  
79  
80  
81  
82  
83  
84  
85  
86  
87

**Abstract:**

Perceptual filling-in (PFI) occurs when a physically-present visual target disappears from conscious perception, with its location filled-in by the surrounding visual background. Compared to other visual illusions, these perceptual changes are crisp and simple, and can occur for multiple spatially-separated targets simultaneously. Contrasting neural activity during the presence or absence of PFI may complement other multistable phenomena to reveal the neural correlates of consciousness (NCC). We presented four peripheral targets over a background dynamically flickering at 20 Hz, to entrain neural populations responding to the background. While participants reported on target disappearances/reappearances via button press/release, we tracked neural activity associated with PFI using steady-state visually evoked potentials (SSVEPs) recorded in the electroencephalogram. Behaviorally, we found that as the number of filled-in targets increased, the duration of target disappearances also increased, suggesting facilitatory interactions among targets located in separate visual quadrants. We found background SSVEPs closely correlated with subjective report, and increased with an increasing amount of PFI. Unexpectedly, we found distinct spatiotemporal correlates for the SSVEP harmonics. Prior to PFI, the response at 40 Hz preceded the response at 20 Hz, which we tentatively link to an attentional effect. There was no difference between harmonics for physically removed stimuli. These results demonstrate that PFI can be used to study multi-object facilitatory interactions, and because there are distinct neural correlates for endogenously and exogenously induced changes in consciousness, it is ideally suited to study the NCC.

**Significance statement:**

Perceptual filling-in (PFI) is a transient illusory disappearance of visual objects from consciousness. By holding the object constant, we can contrast neural activity during periods with and without PFI to isolate the neural correlates of conscious perception. Unlike traditional visual illusions, PFIs are subjectively crisp and simple, and can happen simultaneously at different spatial locations. By frequency-tagging the background display, we demonstrate graded neural correlates for graded changes in consciousness, and provide evidence to differentiate between the perceptual processes evoked during PFI from those evoked by the physical removal of the same peripheral stimuli.

## Introduction

88  
89  
90 In perceptual filling-in (PFI) phenomena, areas of the visual environment that are  
91 physically distinct become interpolated by the visual features of the surrounding texture or  
92 background (Komatsu, 2006; Meng, Remus, & Tong, 2005; Pessoa, Thompson, & Noë,  
93 1998; Ramachandran & Gregory, 1991; Weil & Rees, 2011). Although PFI neatly displays  
94 how our awareness of a visual scene is shaped by (unconscious) inferential processes  
95 (Komatsu, 2006), it has traditionally been investigated to understand how our visual system  
96 compensates for retinal-blind spots (Durgin, Srimant, & Levi, 1995; Komatsu, Kinoshita, &  
97 Murakami, 2000; Ramachandran & Gregory, 1991; Spillmann, Otte, Hamburger, &  
98 Magnussen, 2006), and visual field defects (Gassel & Williams, 1963; Gerrits & Timmerman,  
99 1969; Safran & Landis, 1996). Accordingly, a range of low-level visual attributes such as  
100 target contrast (Stürzel & Spillmann, 2001), target eccentricity (De Weerd, Desimone, &  
101 Ungerleider, 1998), and microsaccades (Martinez-Conde, Macknik, Troncoso, & Dyar, 2006)  
102 have been shown to affect the dynamics of PFI. As a result, the neural interpolation of  
103 information in lower visual areas has been implicated as one active mechanism behind PFI  
104 (De Weerd, Gattass, Desimone, & Ungerleider, 1995; Komatsu, 2006; Meng et al., 2005;  
105 Pessoa et al., 1998).

106 In addition to the role of low-level visual processes, top-down attention and higher-  
107 cortical areas have also been implied to play a role in the initiation, maintenance, and  
108 termination of PFI (De Weerd, Smith, & Greenberg, 2006; Weil, Wykes, Carmel, & Rees,  
109 2012). For example, selectively attending to the location of a target (De Weerd et al., 2006),  
110 or attending to shared features among peripheral targets (De Weerd et al., 2006; Lou, 1999)  
111 has been shown to increase the likelihood of PFI to occur. This poses an intriguing puzzle, as  
112 neural responses to a sensory stimulus usually increase when prioritized by top-down  
113 attention (Harris & Thiele, 2011; Reynolds & Pasternak, 2000; Spitzer, Desimone, & Moran,  
114 2016), and increase when the stimulus is consciously perceived (e.g. De Weerd et al., 1995;  
115 Polonsky, Blake, Braun, & Heeger, 2000; Polonsky et al, but also see Donner, Sagi, Bonnef,  
116 & Heeger, 2008; Logothetis, 1998; Watanabe et al., 2011). As attention during PFI decreases  
117 visibility, PFI is therefore an intriguing resource to investigate the hotly debated dissociation  
118 between attention and consciousness (Koch & Tsuchiya, 2007; Ling & Carrasco, 2006; van  
119 Boxtel, Tsuchiya, & Koch, 2010; Tsuchiya & Koch, 2015). Given this background, we were  
120 motivated to develop a paradigm that could isolate the opposing effects of attention and  
121 consciousness, and explore PFI as a potential candidate paradigm to investigate the neural  
122 correlates of conscious perception.

123 We investigated the neural correlates of PFI through the use of frequency-tagging in  
124 the EEG (Weil, Kilner, Haynes, & Rees, 2007). By presenting flickering visual stimuli,  
125 frequency tagging elicits a steady-state visually evoked potential (SSVEP), which can be  
126 analysed as a narrowband change in power at the flicker-frequency of interest (Norcia,  
127 Appelbaum, Ales, Cottareau, & Rossion, 2015; Vialatte, Maurice, Dauwels, & Cichocki,  
128 2010). This flicker effect is used to ‘tag’ isolated populations of neurons processing each  
129 flickering stimulus (reviewed in Norcia et al., 2015). SSVEPs have been used to track  
130 fluctuations in visual awareness between competing stimuli (Brown & Norcia, 1997;  
131 Lansing, 1964; Sutoyo & Srinivasan, 2009; Tononi, Srinivasan, Russell, & Edelman, 1998;

132 Zhang, Jamison, Engel, He, & He, 2011) as well as to track the allocation of attention  
133 (Andersen, Hillyard, & Müller, 2008; Müller et al., 2006; Müller, Picton, et al., 1998; Müller,  
134 Teder-Salejarvi, & Hillyard, 1998). The latter effect may be particularly strong in the second  
135 harmonic (i.e. frequency double) of the SSVEP driving frequency (Kim, Grabowecky, Paller,  
136 Muthu, & Suzuki, 2007; Kim, Grabowecky, Paller, & Suzuki, 2011). To investigate the  
137 neural correlates of PFI, we combined the SSVEP technique with a novel multi-target PFI  
138 paradigm which allowed us to obtain a more graded response to the amount of change in  
139 conscious perception by means of the number of targets perceptually filled-in.

140

141

## Methods

### 142 *Participants*

143 Twenty-nine healthy volunteers (11 male, 18-39 years of age,  $24 \pm 5$  years) took part  
144 in the study. Participants had normal or corrected-to-normal vision. All participants were  
145 recruited via convenience sampling, provided written informed consent prior to participation,  
146 and received a monetary compensation (30 AUD) for their time. The study was approved by  
147 the Monash University Human Research and Ethics Committee (MUHREC #CLF016).

148

### 149 *Apparatus and stimuli*

150 Participants were seated in a dark room approximately 50 cm distance from a  
151 computer screen (size 29 x 51 cm, resolution 1080 x 1920 pixels, subtending  $32 \times 54^\circ$  visual  
152 angle, refresh rate 60 Hz). The display was composed of a central fixation cross ( $1.03^\circ$  visual  
153 angle in height and width), surrounded by four counter-phase flickering  $2 \times 2$  checkerboard  
154 targets ( $4.56^\circ$  visual angle in diameter). A target was located in each quadrant at  $13.3^\circ$   
155 eccentricity diagonally from the center of the screen (Figure 1). Targets were smoothly alpha-  
156 blended into the background texture following a 2D Gaussian profile ( $SD = 1.06^\circ$  visual  
157 angle in diameter). Each target flickered by reversing the contrast of checkerboard elements  
158 at one of four unique frequencies (8, 13, 15 and 18 Hz). As the background image, we  
159 prepared 100 random patterns prior to the start of each experiment. To construct each  
160 background pattern, we first downsampled the screen to 540 x 960 pixels. Then we assigned  
161 a random luminance value (drawn from a uniform distribution from black to white) to each  
162 down-sampled pixel. These background images were refreshed at a rate of 20 Hz by  
163 randomly selecting from the set of 100 prepared patterns. The checkerboard targets were  
164 created and alpha-blended at the original screen resolution without downsampling.

165

166

### 167 *Task procedure*

168 Each experimental session was composed of 25 trials, 60 seconds per trial. Between  
169 the trials, participants were able to take short self-timed breaks, resulting in a total time-on-  
170 task of approximately 30 minutes. Before the experiment, participants were instructed to  
171 fixate on the central cross, and were informed that they may sometimes experience a visual  
172 illusion where any number of peripheral targets may disappear from their field of vision.  
173 Participants then completed one practice trial to familiarize themselves with the  
174 corresponding button presses required for targets in each of the four visual quadrants.  
175 Specifically, they were instructed to press keys 'A', 'Z', 'K', and 'M' on a traditional

176 QWERTY keyboard, assigning them to the upper left, bottom left, upper right, and bottom  
177 right targets, respectively. Participants were instructed to hold each button for the duration of  
178 disappearance of the corresponding target, and to release it immediately upon the  
179 corresponding reappearance. Figure 1 presents the basic configuration of the experimental  
180 display used (see [Movie 1](#) for an example of the flickering display including physical  
181 removal of the targets, hereafter referred to as catch periods).

182  
183

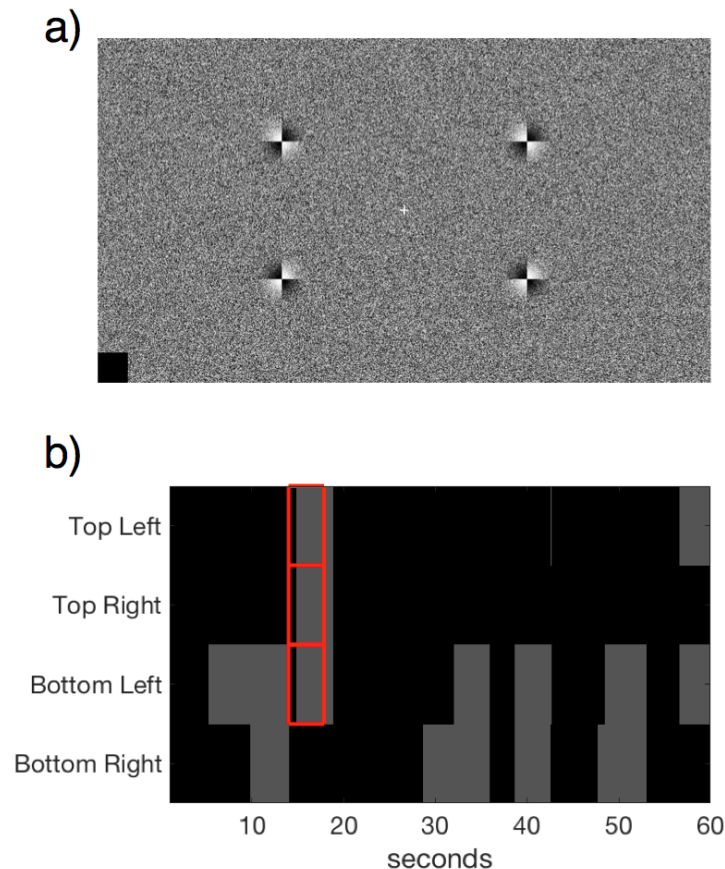

184 *Figure 1: a) Stimulus display containing a central fixation cross, dynamic background*  
185 *(updated at 20 Hz) and four target checkerboard stimuli, each reversing in luminance*  
186 *polarity at a different frequency (8, 13, 15 or 18 Hz). b) Example time course of behavioral*  
187 *responses over a 60-second trial from one participant. Participants were asked to monitor*  
188 *each peripheral target simultaneously, and to press and hold each button upon perceptual*  
189 *disappearance (PFI events shown in grey) at the corresponding location of the target. Catch*  
190 *periods are shown in red, for which targets were physically replaced by the flickering*  
191 *background texture. Note that targets often disappear and reappear together.*

192

### 193 **Catch periods**

194 We introduced catch periods to check if participants were correctly reporting on  
195 disappearances. During a catch period 1 to 4 targets were physically removed from the  
196 display and replaced with the background through alpha blending. Each catch period lasted  
197 from 3.5 to 5 seconds in duration (drawn from a uniform distribution). To mimic the  
198 phenomenology of endogenous PFI events, we generated catch periods by linearly ramping



199 the luminance contrast of the target up or down over 1.5 seconds. Participants were not  
200 informed of the catch periods.

201 These physical catch periods also served as a control condition for comparison with  
202 the neural signals evoked by PFI. Within 24 trials, catch events in which one, two, three or  
203 four targets were removed each occurred on six trials for each participant. The location of the  
204 removed targets in the case of one, two and three targets were randomized. The order of these  
205 catch events were also randomized for each experiment. A previous study showed that  
206 flickering peripheral targets tend not to disappear in the beginning of trials (Schietering &  
207 Spillman, 1987), so each catch event began no sooner than 10 seconds after the beginning of  
208 each trial to ensure that catch disappearances remained indistinguishable from PFI. Our own  
209 data also confirmed that participants reported much lower PFI in the initial 10 seconds of  
210 each trial, with PFI plateauing after approximately 10-15 seconds. We also did not include  
211 catches within the last 10 seconds. We note that for 10 of our 29 participants, four-target  
212 catch periods did not occur due to a coding error, and instead all four targets remained on  
213 screen, resulting in catch periods being presented on 92% of trials overall (over all  $N=29$   
214 participants).

215

#### 216 *Participant and trial exclusion based on catch periods*

217 Initial screening analyses sought to confirm whether participants were able to  
218 simultaneously monitor the visibility of multiple peripheral targets using four unique buttons,  
219 and perform this task accurately and in compliance with instructions. Due to a keyboard  
220 malfunction, button press responses to three and four disappearing targets became  
221 indistinguishable in our post-hoc analysis, and have been analysed together henceforth as “3  
222 or 4 buttons pressed”. In the subsequent analyses where the number of buttons pressed  
223 mattered, we proceeded as if three buttons were pressed in these periods.

224 We analyzed button press responses during catch periods to estimate participant  
225 attention on task. As catch periods were embedded within a trial, some catch periods occurred  
226 when participants had already pressed buttons. Such events are more frequent for those who  
227 report more frequent PFI. To estimate this baseline button press rate per individual  
228 participant, we performed a bootstrapping analysis with replacement. For a given catch onset  
229 in trial T at time S (seconds), we randomly selected a trial T' ( $T=T'$  was allowed) and  
230 epoched the button press time course over the period of  $[S-2, S+4]$  at corresponding catch  
231 target locations in trial T'. We repeated this for all trials ( $T=1...24$ , except for the 4-catch  
232 error mentioned above) to obtain a single bootstrapped set of trials per participant. We then  
233 obtained the mean button-press time course across button-locations from each of the 200  
234 bootstrap sets to obtain a null distribution of the shuffled button-press time course. We also  
235 obtained the mean button-press time course for observed data across button-locations,  
236 excluding catch periods when four targets were removed.

237 As the distribution at each time point for both observed and shuffled data was not  
238 normally distributed, we first converted the data into z-scores using the logit transformation  
239 before calculating the confidence intervals (CI). Then, we used mean z-scores ( $\pm 1.96$   
240 standard deviation of z-scores) as the CI for the null distribution of shuffled data within each  
241 participant, and observed data across participants.

242 We excluded 3 participants whose mean button-press time course around the actual  
243 catch onset failed to exceed the CI within the first two seconds (i.e.,  $[0, S+2]$ ). We defined the  
244 catch-onset reaction time as the first time point after which the mean button-press data  
245 exceeded the top CI, indicating successful button presses for catch targets. Figure 2a shows  
246 the catch response for an example participant retained for analysis. Four further participants  
247 were removed from subsequent analyses for failing to experience PFI during most of the  
248 experimental session (i.e., only brief events on 1 or 2 trials). For the remaining participants,  
249 the mean reaction time to respond to catch onsets, and thus the disappearance of a peripheral  
250 target was 0.92 seconds ( $SD = 0.046$ ). Figure 2b shows the proportion of button press  
251 responses for all catch events across participants retained for analysis ( $N=22$ ).

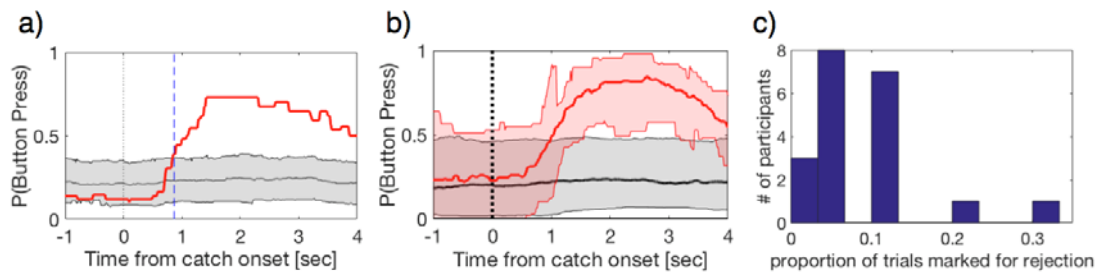

252

253

254 *Figure 2: Catch period analysis and trial rejection following the physical removal of*  
255 *flickering targets at catch onset. a) Example catch response for a single participant. The first*  
256 *time point that the observed likelihood of button press (red) exceeded the bootstrapped CI*  
257 *(grey) corresponds to the catch reaction time (0.87 sec for this participant, marked with a*  
258 *vertical dashed blue line). b) The mean time course for the likelihood of button press and its*  
259 *bootstrapped sets across participants, shown in red and gray respectively. Shading represent*  
260 *the CI (computed with logit transform and presented after reverse transform) across*  
261 *participants. c) Participant-level histogram of the proportion of trials rejected, based on*  
262 *period-by-period catch analysis.*

263

264

265 Having identified which participants could successfully indicate target disappearance  
266 based on their button press data, we continued to identify and remove any trials from the  
267 subsequent analysis in which a catch was not correctly detected. We undertook this procedure  
268 to assure that in all retained trials participants paid proper attention on task and reported  
269 accurately on PFI. We regarded a catch period as being successfully identified if participants  
270 pressed the corresponding button for at least 50% of the allowed response time window. (For  
271 multi-target catch periods, we applied the same criteria for each button separately. If any  
272 button was not pressed at least 50% of the time, the catch was considered undetected. For  
273 four-target catch periods, we analyzed it as if it was a three-target catch period). This window  
274 was from the onset of the catch plus 1 second (in consideration of the reaction time delay) to  
275 the end of catch. For example, if the catch period under consideration was 3.5 seconds in  
276 duration, we defined the allowed time window to be  $[1, 3.5]$  seconds from the catch onset.  
Figure 2c shows a participant-level histogram for the number of rejected trials ( $M \pm SD$ : 1.75

277  $\pm 1.48$  trials or  $8.96 \pm 7.89\%$  of all trials). After participant and trial exclusion, we continued  
278 by examining the behavioral dynamics of PFI.

279

### 280 ***PFI location-shuffling analysis***

281 To investigate whether the simultaneous multi-target PFI observed in participant data  
282 (e.g. Figure 1b) exceeded that to be expected by chance, we performed a shuffling analysis to  
283 create a null distribution. Specifically, we created 1000 shuffled trials for each participant, by  
284 randomly selecting the button press time course for each of the four target locations  
285 independently from any of the trials throughout their experimental session (this could include  
286 multiple locations within the same trial). As such, newly created shuffled trials allowed us to  
287 compare the effect of multiple disappearing target events within the same trial (the observed  
288 data) to the shuffled data without the presence of a temporal correlation between target  
289 locations. If target disappearances during PFI were independent, then shuffled and  
290 experimental data should be similar. The comparison between the observed and the shuffled  
291 data is displayed in Figure 6.

292

293

### 294 ***Linear-mixed effect analysis - Behavior***

295 All statistical analyses were performed using Matlab (ver: R2016b) and jamovi (ver  
296 0.9). We used linear-mixed effect (LME) analysis to examine whether various PFI  
297 characteristics (e.g., durations) were affected by the number of simultaneously invisible  
298 targets (nPFI;  $n=0, 1, 2, 3$  or  $4$ ), including intercepts for participants as a random effect. We  
299 performed likelihood ratio tests between the full model and a restricted model which  
300 excluded the factor of interest (Glover & Dixon, 2004; Pinheiro, Bates, DebRoy, & Sarkar,  
301 2014; Winter, 2013).

302 We also performed LME analyses to compare the slopes of observed and shuffled  
303 data, when considering the effect of the number of simultaneously invisible targets on PFI  
304 characteristics. For this analysis, we fit a linear model (1st order polynomial) to the observed  
305 data across participants ( $N=22$ ), and retained the slope ( $\beta$ ) as our observed test statistic.  
306 Similarly, we also fit the same linear model to each of  $n=1000$  sets of shuffled data, each of  
307 which was computed from the shuffled trials across  $N=22$  participants. We shuffled the trials  
308 within each participant within each set and again retained the  $\beta$  values. Then, we compared  
309 the observed  $\beta$  value with the null distribution of the  $\beta$  values from  $n=1000$  shuffled sets. If  
310 the observed  $\beta$  exceeded the top 97.5% or was lower than 2.5% of the null distribution, we  
311 considered the observed effect to be significant at  $p < .05$  level.

312

### 313 ***EEG acquisition and preprocessing***

314 Throughout each session whole-head EEG was recorded with 64 active electrodes  
315 arranged across an elastic-cap (Brain Products, ActiCap) according to the international 10-10  
316 system. Electrode impedances were kept below 10 k $\Omega$  prior to experimentation, and recorded  
317 using the default reference (FCz) and ground electrode (AFz) via Brainvision recorder  
318 software (sampling rate =1000 Hz, offline bandpass of 0.5-70 Hz). All EEG data was stored  
319 for offline analysis using custom MATLAB scripts (Ver: R2016b), as well as the EEGLAB  
320 (Delorme & Makeig, 2004) and Chronux (Bokil, Andrews, Kulkarni, Mehta, & Mitra, 2010)



321 toolboxes. All EEG channels were first re-referenced to the average of all electrodes at each  
322 sample and downsampled to 250 Hz. We further applied a Laplacian transform to improve  
323 spatial selectivity of the data, which is known to contribute minimal contamination to the  
324 SSVEP when using rhythmic-entrainment source separation (RESS; Cohen & Gulbinaite,  
325 2017), which we used to extract SSVEP responses as detailed below.

326

327

### 328 *SSVEP Signal-to-Noise Ratio (SNR) calculation*

329 To estimate the topography and across-channel correlation of SSVEPs (Figures 5 and  
330 11), we first calculated the natural log of the power spectrum via the fast Fourier transform  
331 (FFT) over the period -3000 to -100 ms before, and 100 to 3000 ms after button press. In the  
332 SSVEP paradigm, we operationally regard power at the tagged frequency as signal and power  
333 at non-tagged neighboring frequencies as noise (Norcia et al., 2015) and compute the signal-  
334 to-noise ratio (SNR) at each frequency. In logarithmic scale, this corresponds to log of the  
335 power at each frequency subtracted by the mean log power across the neighborhood  
336 frequencies. In this paper, all SNR results are based on this log-transformed SNR metric  
337 because without log-transform, SNR is highly skewed and not appropriate for various  
338 statistical tests. Over the 2.9 s time window (half-bandwidth = 0.35Hz), we computed the  
339 SNR at frequency  $f$  (Hz) as the mean log power over the neighborhood frequencies for  $f$   
340 subtracted from the log power at  $f$ . The neighborhood is defined as  $[f-1.22, f-0.44]$  Hz and  
341  $[f+0.44, f+1.22]$  Hz. In addition, we also computed the time-course of the SNR over a 1  
342 second window (half-bandwidth = 1 Hz) with a step-size of 0.15 second, to enable the  
343 comparison of fluctuations in SNR over time. For this shorter time window, we used the  
344 neighborhood as  $[f-3.92, f-1.95]$  Hz and  $[f+1.95, f+3.92]$  Hz to compute the log SNR time  
345 course.

346

347

### 348 *SSVEP analysis via rhythmic entrainment source separation (RESS).*

349 After examining the topography of log SNR responses, we applied rhythmic  
350 entrainment source separation (RESS) to optimally extract the time-course of frequency-  
351 tagged components of SSVEPs without relying upon electrode channel selection (Cohen &  
352 Gulbinaite, 2017). In standard SSVEP analysis, the SNR of the target frequency is examined  
353 by averaging across the electrodes within a region of interest or selecting one electrode in a  
354 certain way (e.g., prior hypothesis, anatomical localization or separate datasets). An  
355 alternative to this classic approach is RESS, which creates a map of spatial weights across all  
356 electrodes which optimize the SNR at a particular frequency, tailored for each participant.  
357 Specifically, RESS functions by creating linear spatial filters to maximally differentiate the  
358 covariance between a signal flicker frequency and neighborhood frequencies, thereby  
359 increasing the signal-to-noise ratio at the flicker frequency. After obtaining signal and  
360 neighborhood covariance matrices, the eigenvector with the largest eigenvalue is used as  
361 channel weights to reduce the dimensionality of multi-channel data into a single component  
362 time course, which reduces multiple comparisons across channels in statistical testing.

363 We constructed RESS spatial filters from 64-channel EEG, by extracting signal data  
364 following a narrow-band filter via frequency-domain Gaussian, centered at flicker

365 frequencies (full-width at half maximum = 1 Hz). Due to the irregular spacing of our target  
366 and background frequencies of interest (8, 13, 15, 18, 20, 40), constructing reference matrices  
367 from immediate neighborhood frequencies was not possible without capturing the signal  
368 present in other simultaneously presented flickering stimuli. As the frequency-neighborhood  
369 across different signals would contain different amounts of simultaneous flicker, we  
370 proceeded by selecting broadband neural activity to construct reference covariance matrices.  
371 Comparing signal to broadband activity has previously been shown to allow the  
372 reconstruction of SSVEP signals using RESS (Cohen & Gulbinaite, 2017).

373 After epoching all data using the time-windows -3000 to -100ms and 100ms to  
374 3000ms peri button press/release, we then constructed RESS spatial filters per participant,  
375 avoiding catch periods. Critically, we performed the above procedure without distinguishing  
376 whether targets were disappearing or reappearing due to button press or release in order to  
377 reduce the possibility of overfitting. If we were to construct separate filters for periods around  
378 the time of target disappearance and reappearance, then any differences between these  
379 conditions could be due to differences in the obtained filters, or overfitting of the filters prior  
380 to our condition comparisons.

381 After application of the RESS spatial filters, we reconstructed the time course of  
382 SSVEP log SNR from the RESS component time courses, separately for each flicker of  
383 interest as described above. While this method may still introduce some noise as a result of  
384 differing amounts of button-press responses per participant, we also compared the obtained  
385 data both pre- and post-RESS analysis. RESS increased the SNR of SSVEPs overall,  
386 however, it did not introduce any statistical biases that were specific to conditions (as a result  
387 of applying the same RESS filters to all conditions; data not shown). With RESS, we were  
388 able to focus our analysis on a single component time courses, without arbitrarily selecting a  
389 single channel or averaging channels, eliminating the need for corrections for multiple  
390 comparisons across channels.

391

### 392 *SNR time-course data cleaning*

393 Preliminary analyses revealed a sharp and consistent decrease in 40 Hz log SNR  
394 amplitude which was time-locked to the beginning of each catch period. Subsequent  
395 inspection of recorded screen flip-times revealed a lag in background stimulus presentation  
396 (16.7-33.3 ms duration) at catch onset, which resulted in the background pixels for one  
397 presentation frame being skipped. This caused an artifact in the spectrogram where the time  
398 window of the analysis included the problematic period. To correct for this artefact  
399 conservatively, we interpolated the 40 Hz SNR time-course from -500 to 500 ms around  
400 physical catch onset.

### 401 *Event-by-event image analysis of button press and SSVEP-SNR*

402 Due to variations in the frequency and duration of PFI per participant, averaging data  
403 over participants is not straightforward. To resolve this, we performed image-based event-by-  
404 event analyses (Fujiwara et al., 2017) to investigate whether the amount of PFI reported may  
405 reflect changes in log SNR. Within each participant, all PFI events were sorted in descending  
406 order based on the sum of buttons pressed at each time point, and over a 3 second time

407 window (see below) per disappearance/reappearance event. For this analysis, we counted  
408 three button presses as 3 even though participants might have tried to press 4 buttons (see  
409 above). For PFI disappearances and reappearances, we averaged this over [0, +3] seconds and  
410 [-3, 0] seconds with respect to the button press or release, respectively. We call this sum of  
411 the number of buttons pressed over these time periods "the amount of PFI". We then  
412 resampled along the trial dimension to 100 samples to map from 0 to 1 (normalized event  
413 count) for each participant. Participant data was then smoothed along the normalized trial  
414 dimension and averaged across participants, to visualize the time-course of SNR as a function  
415 of normalized PFI. This resampling, smoothing and averaging process performed on button-  
416 press responses was repeated for the event-by-event time course of log SNR, with the order  
417 of events predetermined by the corresponding button-press responses per participant. A  
418 schematic pipeline for this entire procedure is displayed in Figure 3.

419 To quantify the relationship between log SNR and the amount of PFI, we grouped  
420 events when the amount of PFI was between 0 and 1, 1 and 2, or greater than 2. A median  
421 split based on the amount of PFI resulted in similar data and subsequent conclusions.

422

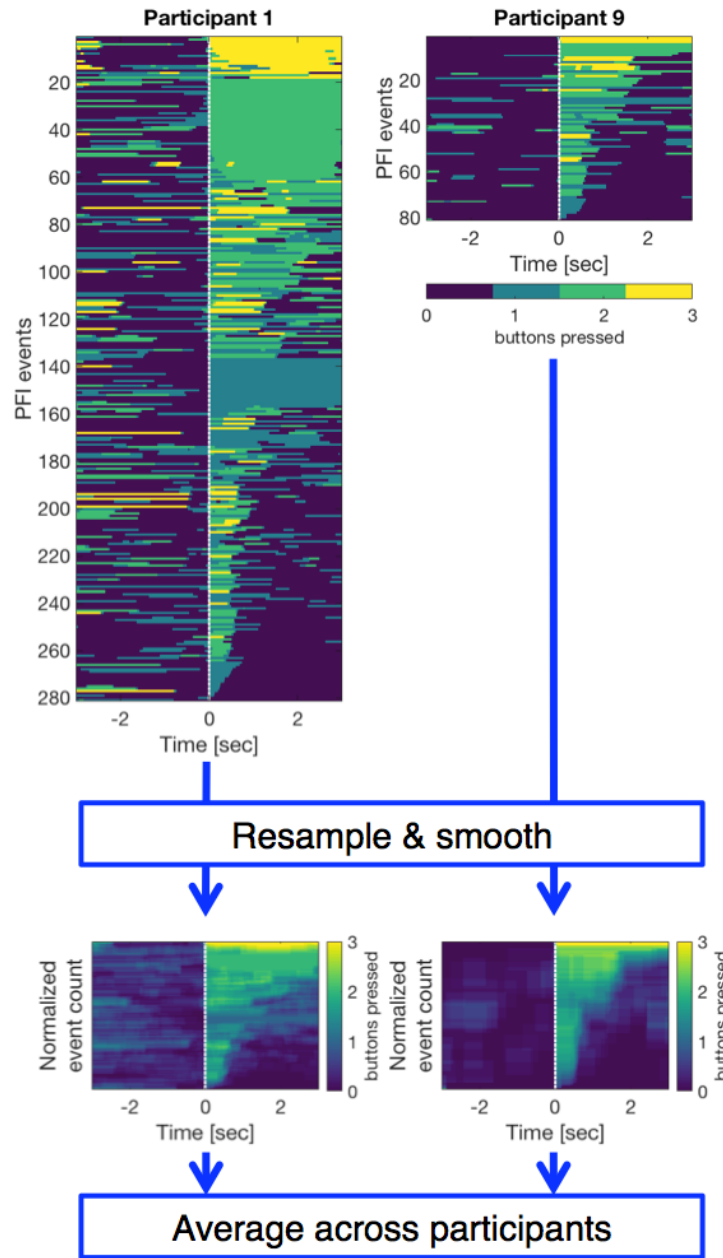

423  
424  
425  
426  
427  
428  
429  
430  
431  
432  
433  
434  
435

Figure 3. Preprocessing for event-by-event based image analyses. PFI events were first sorted according to "the amount of PFI" (the sum of buttons pressed over 3 seconds) occurring after a button-press, or before a button-release event. Each image along the y-axis was then resampled to normalize the trial number into arbitrary units of 100 samples. A 15-sample moving average was then applied to smooth each image along the normalized event-dimension, before averaging across participants. The same process was also applied to RESS log SNR after sorting by the amount of PFI per event based on button-press (or -release) events. This image-based analysis enables us to compare PFI dynamics despite differences in the number of PFI events per participant.

436 **Reconstruction analysis to estimate the impact of multiple-target disappearances and**  
437 **reappearances during PFI and catch periods on SNR**

438 Due to our novel task design, which employs multiple disappearing targets, it is  
439 necessary to account for how much of the temporal dynamics of log SNR may be due to  
440 overlapping PFI events which can accumulate for multiple targets in close temporal  
441 proximity. We approached this problem by performing a SNR reconstruction procedure. This  
442 analysis progressed through three steps (Figure 4).  
443

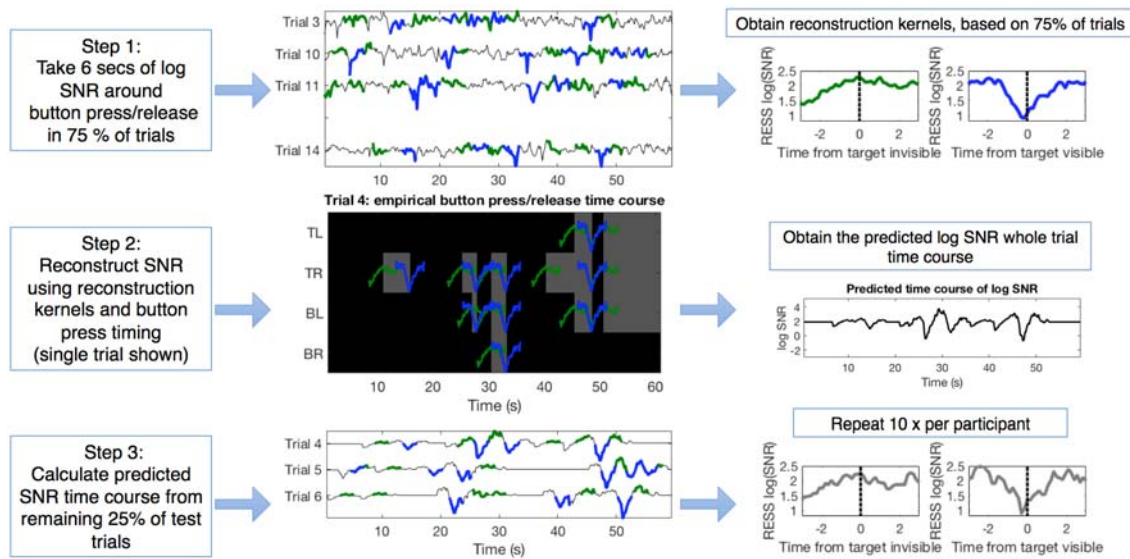

444

445

446 *Figure 4. Pipeline for SNR reconstruction analysis to estimate the impact of accumulated PFI*  
447 *disappearances/reappearances on the observed time course of log SNR. Step 1: we first*  
448 *calculated the reconstruction kernels in response to target disappearance and reappearance*  
449 *events from 75% of training trials per participant. Log SNR around button press/release*  
450 *events (epoched -3 to +3 seconds) is shown in green/blue, respectively. Reconstruction*  
451 *kernels are computed as the mean log SNR time course around button press/release events*  
452 *(over 18 trials, for this participant who had no rejected trials). Step 2: to predict the time*  
453 *course of log SNR, we convolved the reconstruction kernels from Step 1 with recorded time of*  
454 *button press and release events in the remaining test trials (here only displaying 1 trial for*  
455 *demonstration purposes). As multiple PFI disappearances and reappearances can happen*  
456 *across target locations in close temporal proximity (< 1 second), this analysis enabled an*  
457 *estimation of the impact that consecutive PFI events have on SNR time course. The predicted*  
458 *time courses (gray) are computed as the mean log SNR during PFI events for test trials (over*  
459 *6 trials for this participant). The predicted time courses are compared with the observed time*  
460 *courses from the same test trials (6 trials). This entire procedure was repeated 10 times per*  
461 *participant to obtain the mean predicted and observed time course for correlation analysis.*  
462

462

463 First, we calculated the mean log SNR time-course for PFI disappearances and  
464 reappearances using 75% of trials. Within these trials, we stepped through each time-point in  
465 the accumulative button-press responses (0-3 buttons pressed), and epoched the log SNR



466 time-course from -3 to +3 seconds around the time of PFI events, which we defined as any  
467 change in button-press state (6-second epoch). For this analysis, we did not distinguish the  
468 number of disappearing targets at each time-point, just the direction of change (disappearing  
469 or reappearing), and obtained the mean disappearance/reappearance time courses which we  
470 subsequently used as reconstruction kernels. Second, using these reconstruction kernels, we  
471 then predicted the SNR in the remaining 25% of 60-second test trials. We did this by  
472 assuming linearity and time invariance in PFI responses, and predicted the 60-second whole-  
473 trial SNR time course by convolving the 6-second reconstruction kernels with the actual  
474 button-press or -release event times in the test trials. Outside of button press periods, we set  
475 the default SNR value as the baseline SNR value from the same trial (e.g.  $\log(\text{SNR}) = 2.1$   
476 above). Third, from the reconstructed 60-second time course of SNR, we epoched from -3 to  
477 +3 seconds around the PFI events and obtained the mean predicted log SNR time course.  
478 Figure 4b shows this procedure for one 60-second trial. We reconstructed a mean predicted  
479 SNR from across test trials, separately for PFI disappearance and reappearance. We repeated  
480 this reconstruction 10 times to obtain the mean predicted SNR per participant, which we then  
481 averaged across participants. We compared this measure to the observed mean log SNR time  
482 course from the same test trials.

483 We repeated the same procedure to compare the predicted SNR from PFI  
484 reconstruction kernels to the observed SNR during catch periods. This was necessary due to  
485 the embedding of catch periods within multi-target PFI, as catch periods would often overlap  
486 with ongoing button-press and -release events signifying genuine PFI. We were then able to  
487 statistically determine whether the SNR time courses during subjective and physical target  
488 disappearances/reappearances were statistically distinct, by convolving the reconstruction  
489 kernels based on (training) genuine PFI with the button-press or -release event times of (test)  
490 genuine PFI and catch periods.

491 To compare the predicted and the observed SNR time course, we evaluated the degree  
492 of correlation between them over the 6 seconds surrounding button-press and release,  
493 obtaining  $R^2$  for each individual participant. For the statistical analysis, we used repeated  
494 measures two-way ANOVA, testing the main effects of background harmonics ( $1f = 20\text{Hz}$  vs  
495  $2f = 40\text{Hz}$ ) and the nature of disappearance/reappearance (PFI vs catch) on the  $R^2$  between  
496 the observed and the predicted SNR time course.

497

### 498 *Cross-point analysis*

499 Past research on binocular rivalry has indicated that perceptual alternations between  
500 frequency-tagged stimuli are captured in the time course of SNR, and that the time point  
501 when two SNR time courses crossover concurs with button presses to indicate a change in  
502 perception (Brown & Norcia, 1997; Jamison, Roy, He, Engel, & He, 2015; Tononi &  
503 Edelman, 1998; Zhang et al., 2011). We were interested to see whether changes in SNR could  
504 also predict button presses/releases in our multi-target PFI paradigm. At the participant level,  
505 we compared the SNR time course around the time of disappearances to those of  
506 reappearances using a paired-samples  $t$ -tests at each time point. Clusters of significant time  
507 points were identified which satisfied  $p < .05$  (uncorrected) over a minimum of 300ms, a time  
508 window which corresponds to two adjacent time points in our moving-window SNR. Per  
509 participant, the first time point in these clusters, which occurred after the time point where the

510 two time courses crossed each other, was taken as the earliest time point at which the SNR  
511 differentiates between target disappearance and reappearance. We also performed the same  
512 analysis to compare the time course of SNR during physical target disappearance and  
513 reappearance due to catch periods.

514

### 515 *Spatial correlation analysis*

516 To perform the spatial correlation analysis, we calculated the time-course of a 64  
517 channel correlation between 1f and 2f log SNR. Due to differences in the number of PFI  
518 events and catch periods, we downsampled (with replacement) the number of PFI events to  
519 24, which was the maximum number of available catch periods. We then calculated the  
520 correlation for this subset of trials, and repeated this analysis 100 times to obtain a  
521 distribution of downsampled correlation values. The mean correlation value from this  
522 downsampled distribution was then used to compare the spatial correlation of PFI and catch  
523 periods.

524

### 525 *Statistical analysis - EEG*

526 To assess the significance of SSVEP peaks in the EEG spectra, we corrected for  
527 multiple comparisons with a False Discovery Rate (FDR) of .05 (Benjamini, Krieger, &  
528 Yekutieli, 2006; Benjamini & Yekutieli, 2001). For corrections of multiple comparisons on  
529 the time courses, we used temporal cluster-based corrections (Davidson, Alais, van Boxtel, &  
530 Tsuchiya, 2018; Maris & Oostenveld, 2007). For this analysis, the sum of observed test-  
531 statistics (e.g.,  $t$  scores) in a temporally contiguous cluster were retained for comparison with  
532 a permutation-based null distribution. Specifically, first, we detected any temporally  
533 contiguous cluster by defining a significant time point as  $p < .05$  uncorrected (Maris &  
534 Oostenveld, 2007). Then, we concatenated the contiguous temporal time points with  $p < .05$   
535 and obtained a summed cluster-level test statistic for the cluster. Second, we repeated this  
536 procedure after shuffling the subject specific averages within each participant 2000 times.  
537 From each of the 2000 shuffled data, we obtained the summed cluster-level test statistics at  
538 contiguous temporal time points with  $p < .05$  uncorrected, which served as a null distribution.  
539 We regarded the original observed effect to be significant if the original summed cluster-level  
540 statistics exceeded the top 97.5% of the null distribution of the summed statistics (as  $p_{cluster} <$   
541  $.025$ ).

542

## 543 **Results**

### 544 **Overview:**

545 Our presentation of the results will be structured as follows. First, we confirmed that  
546 our overall SSVEP frequency tagging was successful (Figure 5). Second, we checked if the  
547 behavioral reports during catch periods were correlated with neural activity (RESS log SNR,  
548 Figure 6). Third, we investigated the *behavioral* reports during genuine PFI events, and  
549 focused on whether or not spatially separated PFI targets interact across visual quadrants  
550 (Figure 7). Fourth, we then focused on RESS log SNR during PFI events, testing if the  
551 amount of PFI correlated with the strength of frequency-tagged EEG activity induced by our  
552 flickering background (Figure 8, Figure 9). Fifth, we devised a SNR reconstruction analysis  
553 to estimate the influence of multiple PFI events in close temporal proximity on the RESS log

554 SNR (Figure 10). Sixth and finally, we also found unexpected temporal (Figure 11) and  
555 spatial (Figure 12) differences between PFI events and catch periods, with respect to the first  
556 (1f) and second harmonic (2f) responses (log SNR) to background flicker, which we interpret  
557 in our Discussion.

558

559

### 560 **Successful frequency-tagging of dynamic background in PFI display:**

561 We first investigated the log SNR of target (8, 13, 15, 18 Hz) and background (20 Hz)  
562 flicker frequencies and their harmonics. Using a short window (2.9 second duration, see  
563 Methods), we found strong and occipitally localized responses to background flicker, but no  
564 clear responses to target flicker. To increase the chance of finding target entrainment in the  
565 EEG signal, we also analyzed the data with the longest time window (60 second for one trial,  
566 including catch periods) with the highest frequency resolution. Still we did not detect reliable  
567 target-related SSVEPs (Figure 5a).

568 While the 1f (20 Hz) and 2f (40 Hz) frequency-tagged responses to our background  
569 display were strongest at POz, the spatial topographies differed between 1f and 2f (Figure  
570 5b). The 1f response was localized to midline occipital electrodes, while the 2f response  
571 extended beyond these regions to include lateral parieto-occipital and parietal electrodes. We  
572 continued to analyze the time-course of log SNR for background-related 1f and 2f responses  
573 after applying rhythmic entrainment source separation (RESS; Cohen & Gulbinaite, 2017), to  
574 optimally extract the SNR per participant given these differences in source topography and to  
575 avoid multiple comparisons across electrodes (see Methods). From here, all SNR values we  
576 present are the RESS log SNR (except for the spatial correlations presented in Figure 13).

577

578

579

580

581

582

583

584

585

586

587

588

589

590

591

592

593

594

595

596

597

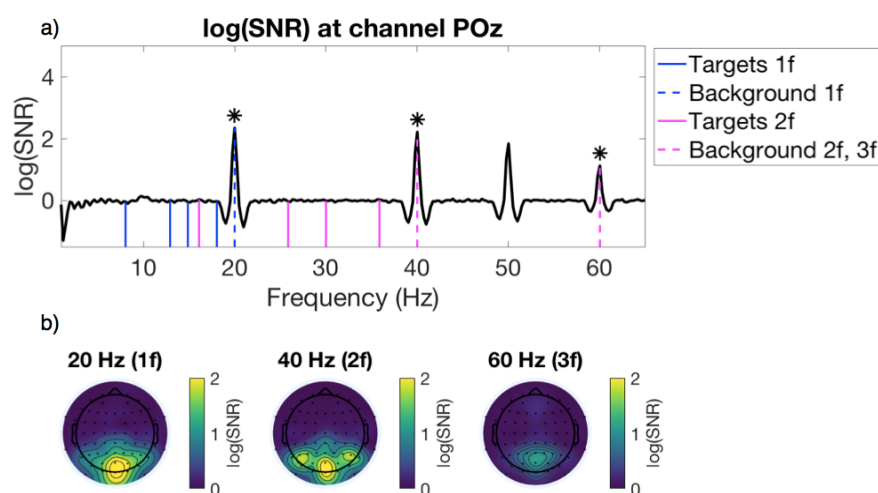

592 *Figure 5. Average SSVEP responses in our paradigm. a) The mean log SNR spectrum over*  
593 *all participants and periods of PFI (POz). Asterisks mark log SNR significantly different from*  
594 *0, FDR-adjusted across all frequencies to  $p < .05$ . b) Topoplots for the mean log SNR at 1f*  
595 *(20 Hz), 2f (40 Hz) and 3f (60 Hz) of background-related SSVEPs. The mean is taken across*  
596 *participants over all epochs, excluding catch periods.*

598

### 599 **Frequency tagging during catch periods**

600 Having identified the successful entrainment of 1f and 2f background responses  
601 (Figure 5), we analyzed the time course of changes to the RESS log SNR at 1f and 2f during  
602 catch periods. As SSVEPs tend to be weak for peripherally presented stimuli (Norcia et al.,  
603 2015), we checked if the physical removal of targets was strong enough to alter the time  
604 course of the RESS log SNR. During catch periods, we compared the mean RESS log SNR  
605 during -2 to -1 to +1 to +2 seconds (two-tailed paired samples *t*-tests). The SNR to  
606 background flicker increased upon target removal (1f,  $t(21) = 3.80$ ,  $p = .0011$ ; 2f,  $t(21) = 2.21$ ,  
607  $p = .04$ ). The background SNR also decreased upon target return (1f,  $t(21) = -3.51$ ,  $p = .0021$ ;  
608 2f,  $t(21) = -3.50$ ,  $p = .0021$ ). The increase/decrease of the RESS log SNR started upon button  
609 press/release, which we return to and investigate in our SNR-reconstruction analysis (Figure  
610 4 and 11). These results are consistent with an interpretation that the background 1f and 2f  
611 SNR increases when peripheral regions are physically interpolated by the flickering  
612 background display.

613

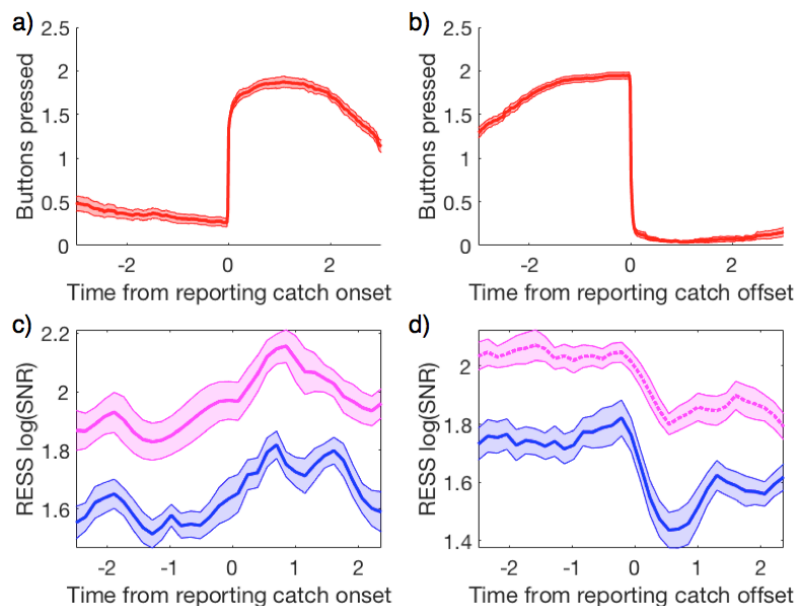

614

615 *Figure 6. Button press time course and background RESS log SNR around catch periods. a-*  
616 *b) mean ( $\pm 1$  SEM) button-press time course across participants when responding to the*  
617 *physical removal of targets near the onset (a) and the offset (b) of catch periods. c-d) RESS*  
618 *log SNR for background SSVEP at 1f (20 Hz; blue) and 2f (40 Hz; magenta). Shading*  
619 *represents  $\pm 1$  SEM corrected for within participant comparisons (Cousineau, 2005).*

620

621

### 622 **Synergistic effect of multi-target PFI**

623 Next, we turn to the *behavioral* analysis of the genuine PFI events before interpreting  
624 the EEG effects. Specifically, we investigated whether our unique multi-target design had  
625 captured an interaction between the four simultaneously presented peripheral targets.  
626 Previous research has suggested that neighboring targets within a single visual quadrant may

627 disappear together (De Weerd et al., 1998). Our design allowed us to examine whether much  
628 more widely distributed peripheral targets also interact. Such an interaction would be non-  
629 trivial if occurring across all four quadrants of the visual periphery, as it could imply the  
630 grouping of targets for PFI despite their disparate retinotopic locations. This would imply the  
631 involvement of potentially high-level neural mechanisms that have access to these long-range  
632 relations (Wagemans et al., 2012).

633 First, we analyzed whether the number of targets simultaneously invisible were  
634 related to 1) the number of PFI events per trial, 2) the average duration of PFI invisibility per  
635 event, and 3) the total duration of PFI per trial (Figure 6, blue bars). In theory these three  
636 variables can vary independently, and in practice they can dissociate (Bonneh, Donner,  
637 Cooperman, Heeger, & Sagi, 2013; McEwen, Paton, Tsuchiya, & van Boxtel, 2018; Thomas,  
638 Davidson, Zakavi, Tsuchiya, & van Boxtel, 2017). While periods when all targets were  
639 visible had the longest average duration and total duration (i.e., the number of invisible  
640 targets = 0, the left-most bars in Figure 6), the more interesting trends were found as the  
641 number of invisible targets increased. While simultaneous disappearances of 3 or 4 targets  
642 were rare (only 2-3 events per trial; Figure 6a), when they happened, the event tended to be  
643 sustained for a long duration (~2 sec, Figure 6b). As a result, the total duration of 3 or 4 target  
644 invisibility (~8 sec per trial, Figure 6c) is comparable to that of 2 target invisibility and longer  
645 than that of 1 target invisibility, which happened at the highest rate (8.5 events per trial, 4  
646 seconds in total per trial). We formally tested this linear trend by LME analysis and  
647 likelihood ratio tests (see Methods). The number of invisible targets (nPFI; 1, 2, 3 or 4:  
648 removing 0) significantly affected 1) the number of PFI events per trial ( $\chi^2(2) = 47.83, p =$   
649  $4.1 \times 10^{-11}$ ), 2) the average duration of PFI per event ( $\chi^2(2) = 23.59, p = 7.53 \times 10^{-6}$ ) and 3) total  
650 PFI duration per trial ( $\chi^2(2) = 7.27, p = .026$ ).

651 These significant trends imply that interactions among distant targets occur in a  
652 synergistic way, and that when one target is invisible it is often accompanied by other  
653 invisible targets. To directly test if this is the case, or if these trends occur by chance, we  
654 employed a shuffling analysis (see Methods). For this, we first sub-selected the button press  
655 time course for each location from any four trials (with replacement) and re-computed the  
656 behavioral analysis per participant. We repeated this shuffling procedure 1000 times, and  
657 from each shuffled dataset we retained the mean PFI data across participants. As the location  
658 of each button press in shuffled data could come from any independent trial (e.g. top left =  
659 trial 1, top right = trial 23, bottom left = trial 18, bottom right = trial 18), this shuffling  
660 procedure conserved the mean number of PFI events overall, while estimating the level of  
661 simultaneous invisibility between multiple PFI targets that occurs by chance, when locations  
662 are independent.

663 In the shuffled data, the number of PFI events per trial decreased as the number of  
664 invisible targets (nPFI) increased, which is similar to what we observed in the empirical data  
665 (11, 7, and 4 events per trial for 1, 2, and 3 or 4 target invisibility; Figure 6a, grey bars).  
666 However, the trend for shuffled data was quite different from the empirical data for the  
667 average durations per PFI event, which were roughly equal across nPFI in shuffled data (2,  
668 1.8, and 1.8 seconds, respectively; Figure 6b), and the total duration of PFI per trial, which  
669 decreased as a function of the number of invisible targets (16, 10, and 4 seconds,  
670 respectively; Figure 6c).



671 To statistically evaluate these trends between the observed and the shuffled data, we  
 672 compared the slopes of the linear fit (LME, with random intercepts for each subject) for each  
 673 of the three PFI variables as a function of the number of invisible targets (nPFI; 1, 2, 3 or 4:  
 674 removing 0). For all variables, the observed slope was outside the top 97.5% of the slopes in  
 675 the shuffled data (corresponding to two-tailed  $p < .05$ , Figure 6d-f). Notably, Figure 6e and f  
 676 establish that the observed positive slope for observed data in Figure 6b and 6c are contrary  
 677 to the expected negative slope in shuffled data. In other words, if there are no spatial  
 678 interactions between distant targets, as in our shuffled data, then we should expect the  
 679 simultaneous invisibility of 3 or 4 targets to be highly unlikely, and sustained for a shorter  
 680 duration. By contrast, the observed data show that as more targets are involved with a  
 681 disappearance event, the longer the disappearances are sustained, strongly suggesting a  
 682 facilitatory interaction between invisible peripheral targets. We return to this synergistic effect  
 683 of multi-target PFI in our Discussion.  
 684

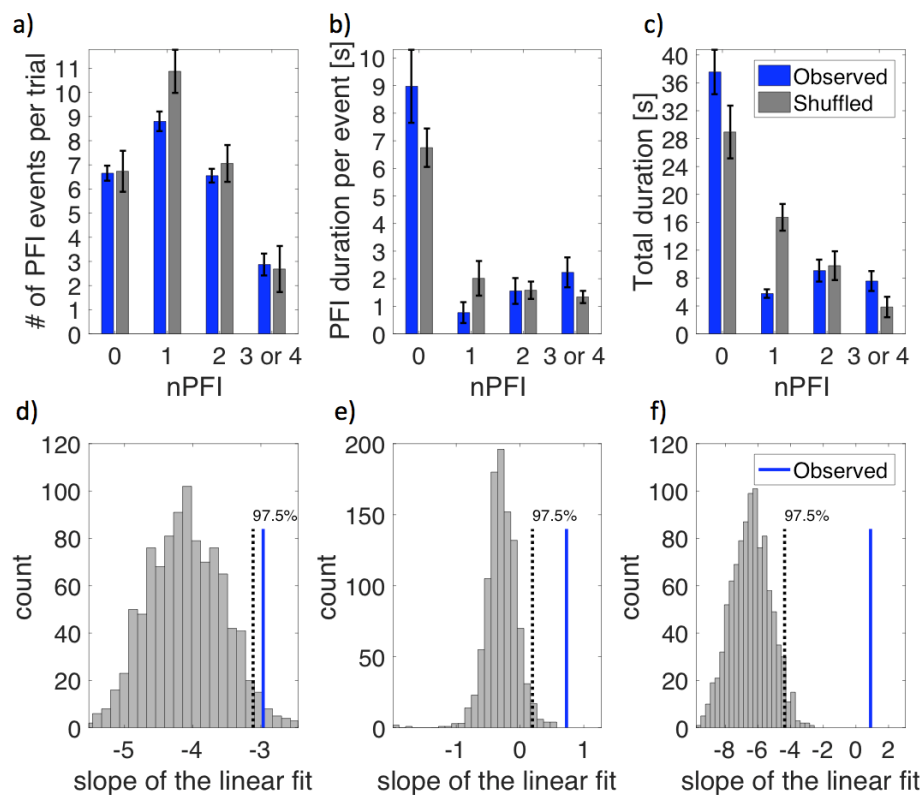

685 *Figure 7. Behavioral data. a) The number of PFI events per trial, b) the mean duration per*  
 686 *PFI event, and c) total duration of PFI per trial, as a function of the number of invisible*  
 687 *targets (nPFI). All panels display both observed (blue) and shuffled (grey) data. For the*  
 688 *observed data, error bars represent 1 SEM, corrected for within-participant comparisons*  
 689 *(Cousineau, 2005). For the shuffled data, we first computed the SEM within each shuffled*  
 690 *data set across participants. Then, as the error bar, we show the mean of the SEM across*  
 691 *1000 shuffled sets. d-f) Slope of the linear fit for each of the PFI variables in a-c as a function*  
 692 *of nPFI (excluding nPFI=0) for the observed (blue line) vs the shuffled data (1000 sets, gray*  
 693 *histogram).*  
 694

695 *SSVEP time course: event-by-event image analysis reveals graded changes in conscious*  
696 *perception*

697 After demonstrating that spatially distributed targets were interacting, strongly  
698 implying the involvement of high-level neural mechanisms during PFI, we turned to the  
699 neural correlates of PFI via EEG analysis of SSVEPs. We first visualized how the changes in  
700 PFI were related to changes in the log SNR of background flicker using an event-by-event  
701 image-based analysis. To compare the time course of button press and SNR across  
702 participants, we first sorted, per participant, all instances of PFI disappearance (or  
703 reappearance) by the sum of the number of buttons simultaneously pressed over 3 seconds  
704 after (or before) the button press, which we define as “the amount of PFI” (see Methods and  
705 Figure 8). We then resampled each participants image into a uniform height, to obtain the  
706 across-participant mean despite the differences in individual PFI dynamics (see Methods and  
707 Figure 4). This results in the highest (and lowest) rows of the figures representing events with  
708 the highest (and lowest) amount of PFI (Figure 8a, 8b). Figure 8c-f show the corresponding  
709 RESS log SNR related to 1f and 2f background SSVEP responses.

710 From this analysis, two qualitative insights emerged. First, that RESS log SNR for 1f  
711 and 2f increase just before button press when targets disappear (at time = 0), and increase  
712 with the amount of PFI (Figure 8c and d). Second, RESS log SNR for 1f and 2f decrease just  
713 before button release at target reappearance, but there is no dependence on the amount of PFI  
714 (Figure 8e and f).

715 To quantitatively compare these differences, we split SNR time courses based on the  
716 amount of PFI. Figure 8g-j show the mean RESS log SNR over each 6 second epoch,  
717 separately averaged for events with the amount of PFI between 0 and 1, 1 and 2, or greater  
718 than 2. Around the target disappearance events, we found a significant linear effect for the  
719 amount of PFI on the SNR for both 1f ( $\chi^2(1) = 8.75, p = .003$ ) and 2f ( $\chi^2(1) = 8.21, p = .004$ )  
720 responses to background flicker (Figure 8g and h). Around target reappearance events, by  
721 contrast, the amount of PFI did not significantly affect the SNR (Figure 8i and j, 1f;  $p = .76$ ;  
722 2f;  $p = .83$ ). Figure 8k-n displays the time course of the SNR separately for 3 levels of the  
723 amount of PFI around the time of button press and release.

724

725

726

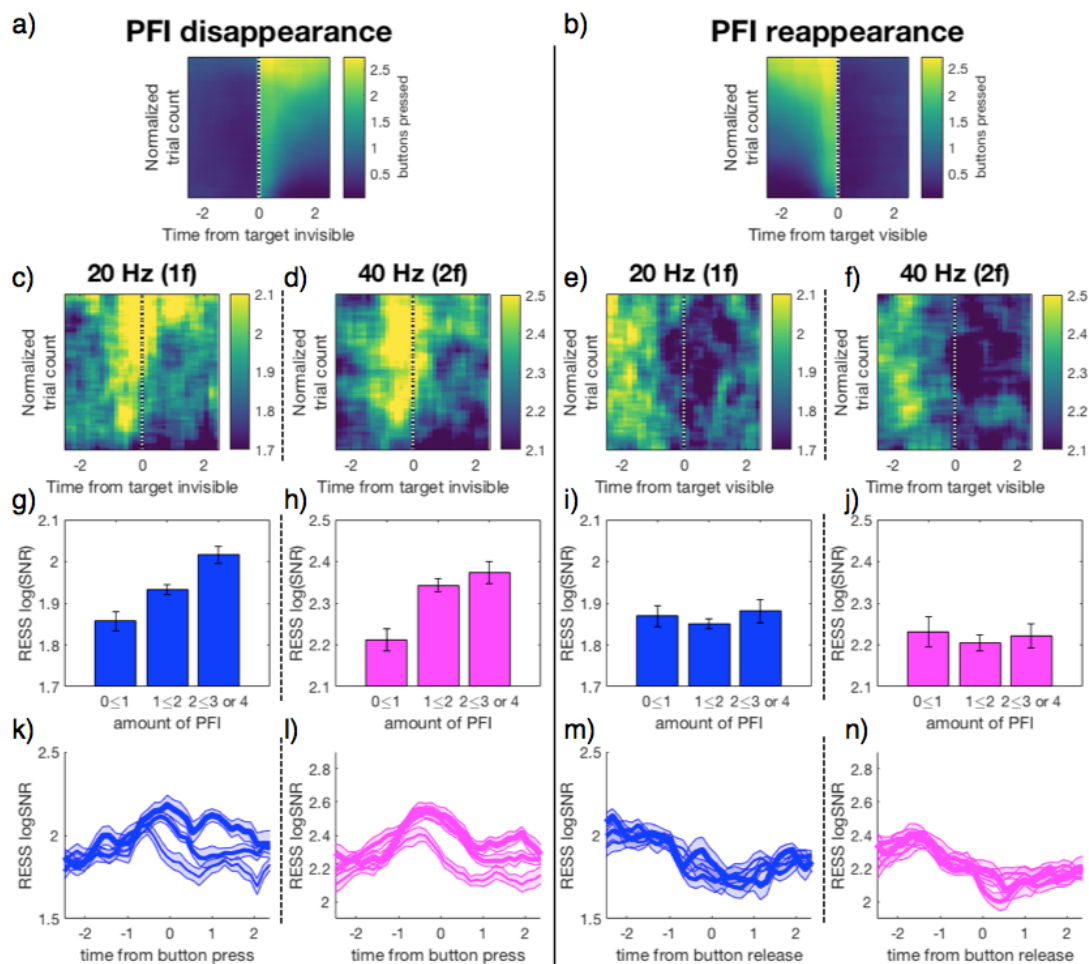

727

728 *Figure 8. The amount of PFI is correlated with the RESS log SNR around PFI*  
 729 *disappearances (left side of the panels), but not reappearances. Event-by-event image*  
 730 *analysis of button press and release (a and b) and RESS log SNR (c-f) after sorting based on*  
 731 *the amount of PFI per event, per participant. Background responses at 1f are shown on the*  
 732 *left column and separated from those at 2f on the right of by dotted lines. g-j) Bar graphs for*  
 733 *the mean RESS log SNR over -3 to 3 sec as a function of the amount of PFI. k-n) The time*  
 734 *course of RESS log SNR around the button press or release, separated by the amount of PFI,*  
 735 *with three levels of the amount indicated by the thin, middle and thick lines. Error bars in g-j*  
 736 *and shading for k-n indicate 1 SEM across participants (adjusted for within-participant*  
 737 *subject comparisons Cousineau, 2005).*

738

739 ***Reconstruction analysis: SNR time courses during PFI are distinct from those in catch***  
 740 ***periods***

741

742 While the previous analysis has shown that changes to the log SNR of background  
 743 flicker were related to the amount of PFI, it does not take into account the effects of complex  
 744 overlapping button responses that are required in our multi-target PFI task. Unlike other tasks

745 that have investigated the neural correlates of bistable perception with a single target, our task  
746 design allowed graded changes in consciousness to occur in close temporal proximity (< 1  
747 second), and even to overlap (Figure 1b). To account for how much of the log SNR time  
748 course could be accounted for by sequential responses, we performed an SNR-reconstruction  
749 analysis; we used 75% of training trials to construct reconstruction kernels, and applied these  
750 to the remaining 25% of test trials to predict the log SNR time course (Figure 4). We then  
751 compared the predicted time course of log SNR with the actual time course around the button  
752 press events in the test trials during genuine PFI and during catch periods. Figure 9 visualizes  
753 the high quality of prediction for the genuine PFI (Figure 9 e and g) and the poor predictive  
754 quality for catch periods (Figure 9 f and h).

755 To quantify prediction accuracy as the degree of correlation between the predicted  
756 and the observed time course, we calculated  $R^2$  between the respective 6-second RESS log  
757 SNR around button press/release events during genuine PFI and catch periods. For both 1f  
758 and 2f, the predicted SNR was correlated more strongly with genuine PFI than the catch, for  
759 both disappearances and reappearances (Table 1). Using 3-way repeated measures ANOVA  
760 (Table 2), we confirmed that the prediction accuracy is significantly better for the genuine  
761 PFI than catch periods (main effect:  $F(1, 21) = 151.01, p = 4.7 \times 10^{-12}$ ). We found no or weak  
762 main effects or interactions due to other factors (i.e., 1f vs 2f, disappearances vs  
763 reappearances).

764 One source of the difference in the quality of prediction could be the presence of  
765 competitive (inhibitory) interactions between the background and target stimuli during PFI  
766 (De Weerd et al., 1995; Weil & Rees, 2011), which are absent during catch periods.  
767 Unfortunately, as we could not frequency-tag the targets (i.e., 8, 13, 15 and 18 Hz), we  
768 cannot address the nature of these competitive interactions further. To uncover the nature of  
769 this interaction, future experiments may try to optimize the parameters in such a way as to  
770 frequency-tag both the target (e.g. Weil et al., 2007) and background stimuli during PFI.  
771 Next, we continue by analysing the timing of these relative changes during target  
772 disappearance and reappearance in more detail, using a cross-point analysis.

773

774

775

776

777

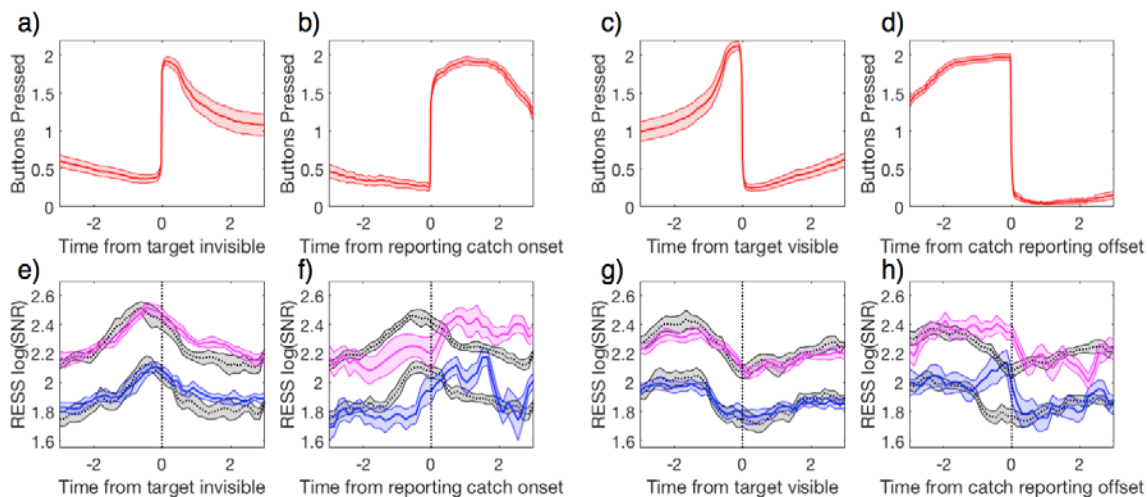

778

779 *Figure 9. Reconstruction analysis. a-d) mean button-press and e-h) RESS log SNR time*  
 780 *course across participants around genuine PFI events for disappearance (a, e) and*  
 781 *reappearance (c, g) and around catch disappearance (b, f) and reappearance (d, h). Note*  
 782 *that for all panels, time 0 is always defined by a button press or release. e-h) The observed*  
 783 *SNR time course is shown from test trials (blue for 1f and magenta for 2f), which were not*  
 784 *used to construct the reconstruction kernels. The correlation ( $R^2$ ) between the observed SNR*  
 785 *and the predicted SNR (shown in grey) was used to quantify prediction accuracy. Shading*  
 786 *represents 1 SEM across participants (corrected for within participant comparisons;*  
 787 *Cousineau, 2005).*

788

789

790

Table 1. Prediction accuracy (as  $R^2$ ) across reconstruction analyses

|                    | PFI<br>1f<br>disap. | PFI<br>2f<br>disap. | Catch<br>1f<br>disap. | Catch<br>2f<br>disap. | PFI<br>1f<br>reap. | PFI<br>2f<br>reap. | Catch<br>1f<br>reap. | Catch<br>2f<br>reap. |
|--------------------|---------------------|---------------------|-----------------------|-----------------------|--------------------|--------------------|----------------------|----------------------|
| Mean               | 0.50                | 0.54                | 0.08                  | 0.13                  | 0.45               | 0.49               | 0.12                 | 0.13                 |
| Std. error mean    | 0.05                | 0.05                | 0.03                  | 0.03                  | 0.05               | 0.05               | 0.03                 | 0.04                 |
| Standard deviation | 0.23                | 0.22                | 0.12                  | 0.14                  | 0.25               | 0.22               | 0.16                 | 0.17                 |

791

792

793

794

795

796

797



798

Table 2. Results of 2 x 2 x 2 repeated measures ANOVA on R<sup>2</sup> values

|                                                     | Sum of Squares | df | Mean Square | F      | p     | partial $\eta^2$ |
|-----------------------------------------------------|----------------|----|-------------|--------|-------|------------------|
| PFI vs. Catch                                       | 6.24           | 1  | 6.24        | 151.01 | <.001 | 0.88             |
| Residual                                            | 0.87           | 21 | 0.04        |        |       |                  |
| 1f vs. 2f                                           | 0.06           | 1  | 0.06        | 0.94   | 0.342 | 0.04             |
| Residual                                            | 1.25           | 21 | 0.06        |        |       |                  |
| Disap. vs. Reapp.                                   | 0.01           | 1  | 0.01        | 0.45   | 0.512 | 0.02             |
| Residual                                            | 0.67           | 21 | 0.03        |        |       |                  |
| (PFI vs. Catch) x (1f vs. 2f)                       | 0.00           | 1  | 0.00        | 0.07   | 0.792 | 0.00             |
| Residual                                            | 0.65           | 21 | 0.03        |        |       |                  |
| (PFI vs. Catch) x (Disap. vs. Reapp.)               | 0.05           | 1  | 0.05        | 5.34   | 0.031 | 0.20             |
| Residual                                            | 0.21           | 21 | 0.01        |        |       |                  |
| (1f vs. 2f) x (Disap. vs. Reapp.)                   | 0.01           | 1  | 0.01        | 0.47   | 0.499 | 0.02             |
| Residual                                            | 0.39           | 21 | 0.02        |        |       |                  |
| (PFI vs. Catch) x (1f vs. 2f) x (Disap. vs. Reapp.) | 0.00           | 1  | 0.00        | 0.28   | 0.603 | 0.01             |
| Residual                                            | 0.34           | 21 | 0.02        |        |       |                  |

Note. Type 3 Sums of Squares

799

800 ***Cross-point analysis: 1f and 2f background-related responses are temporally distinct***  
 801 ***during PFI***

802 Our reconstruction analysis similarly predicted both the 1f and 2f components of  
 803 background-related SNR during PFI events, which is not surprising given that these  
 804 responses were driven by the same stimuli. Curiously, however, these harmonic responses  
 805 were topographically distinct (Figure 5b). As there is a nascent literature suggesting that  
 806 SSVEP harmonics may correspond to separate cognitive processes (Kim et al., 2007, 2011),  
 807 we next investigated these spatiotemporal differences in more detail.

808 First, we investigated whether the RESS log SNR time course differed depending on  
 809 the nature of disappearances/reappearances: due to physical (catch) or perceptual (PFI). We  
 810 compared the time courses between target disappearance and reappearance, superimposing  
 811 these time courses in the same plot and calculating the crossover points of the RESS log  
 812 SNR. For 1f (Figure 10a and 10b, blue), the RESS log SNR during disappearances (solid

813 lines) became larger than that during reappearances (dotted lines). This effect occurred from -  
 814 0.67 seconds prior to subjective report (paired  $t$ -tests,  $p_{cluster} < .001$ ). Notably, these effects  
 815 occurred 1.06 seconds later for catch periods (Figure 11b, from 0.39 seconds,  $p_{cluster} < .001$ ).  
 816 For 2f (Figure 10a and b, magenta), the RESS log SNR also became larger during  
 817 disappearances than reappearances from -.97 seconds prior to report ( $p_{cluster} < .001$ ), and  
 818 again, were shifted roughly 1.36 seconds compared to the catch-related time course (Figure  
 819 11b, from 0.39 seconds;  $p_{cluster} < .001$ ).

820 The observed divergence (0.3 seconds) in the crossover time for 1f and 2f seemed  
 821 quite large given that both 1f and 2f were evoked from the same stimulus, using identical  
 822 participants and events. As such we further investigated if this effect could be observed at the  
 823 participant level. For this analysis, we calculated for each participant the first time point at  
 824 which the strength of background RESS log SNR during disappearance exceeded that during  
 825 reappearance (running paired  $t$ -tests). Using this criterion, we found that 2f responses crossed  
 826 over at -1.02 seconds ( $SD = 0.41$ ), 170 ms seconds earlier than 1f responses, at -0.85 seconds  
 827 ( $SD = 0.37$ , Wilcoxon signed rank test,  $z = 2.13$ ,  $p = .012$ ). No difference was observed in  
 828 cross over time for the catch-related 1f and 2f time courses ( $p = .14$ ).  
 829  
 830

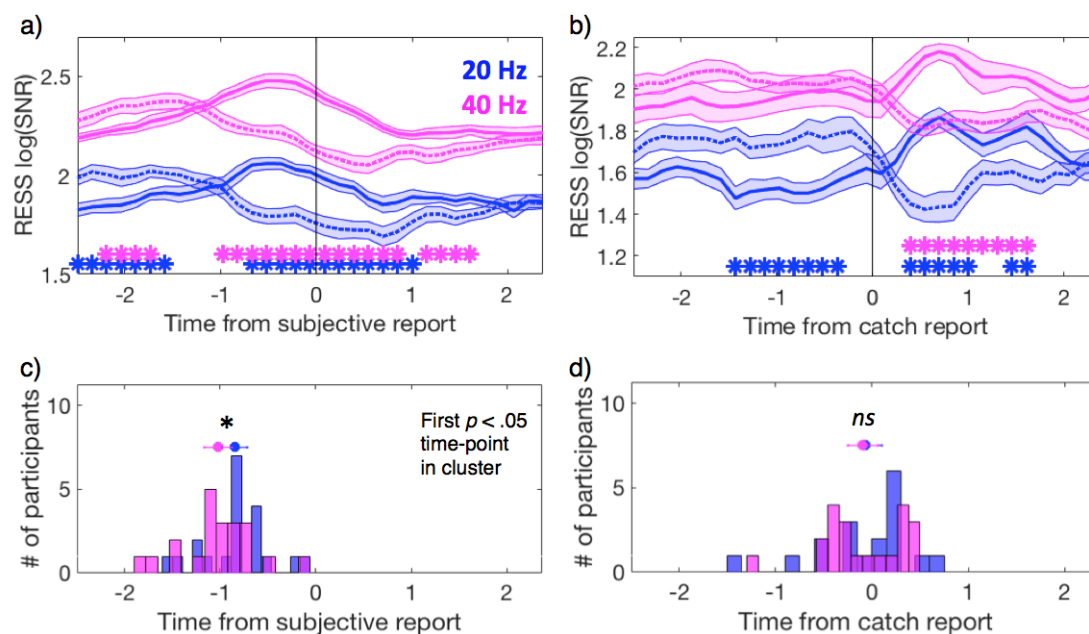

831  
 832 *Figure 10. Distinct temporal profile of the harmonic responses. a and b) Relative time course*  
 833 *of the 1f (20 Hz, blue) and 2f (40 Hz, magenta) RESS log SNR during PFI events (a) and*  
 834 *catch periods (b). Solid and broken lines represent disappearance and reappearance,*  
 835 *respectively. c and d) Participant-level histograms for the first significant time point when*  
 836 *comparing between the RESS log SNR for disappearance and reappearance during PFI (c)*  
 837 *and catch (d). Horizontal lines indicate 1 SE about the mean corrected for within-subject*  
 838 *comparisons (Cousineau, 2005).*  
 839

840

### 841 ***Spatial Correlation: 1f and 2f background responses are spatially distinct during PFI***

842 One potential factor that could have contributed to the difference in the crossover time  
843 between 1f and 2f is a difference in the spatial filters used for 1f and 2f within RESS analysis.  
844 In fact, when we focused only on the (non-RESS) log SNR from a single electrode (POz), the  
845 difference in cross-over times between 1f and 2f was not significant at the group or  
846 participant level (data not shown). Given this, we further analyzed whether the spatial  
847 characteristics for 1f and 2f were also distinct without using RESS spatial filtering during  
848 PFI.

849 Around the catch events, spatial correlations across 64 channels were constant (Figure  
850 12b). However, when targets disappeared during PFI, the spatial correlation between 1f and  
851 2f transiently increased (Figure 12a). The difference between the time courses was significant  
852 for the time-window -0.67 to 0.25 seconds around subjective report (paired *t*-tests at each  
853 time point,  $p_{cluster} < .001$ ). The same pattern of results was maintained when using a parietal  
854 or occipital sub-region of electrodes (but no change in correlation was seen for frontal or  
855 temporal electrodes), indicating that synchronous changes in predominantly parieto-occipital  
856 SNR were responsible for changes to the whole-head correlation over time. The same pattern  
857 was also observed when subtracting the mean log SNR per channel prior to calculating this  
858 spatial correlation over time (data not shown).

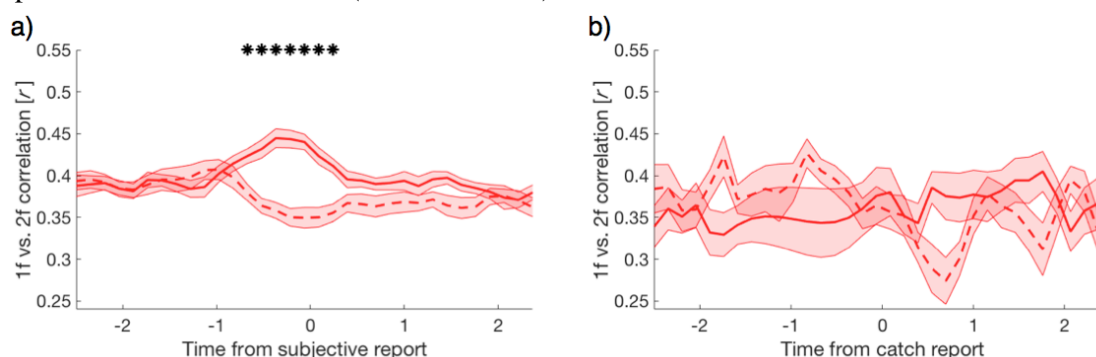

859

860 *Figure 11. Time course of the spatial correlation coefficient (r) between 1f and 2f (non-*  
861 *RESS) log SNR across 64 electrodes. Correlation coefficient was computed across 64*  
862 *electrodes at each time point per participant. The mean time courses of correlation*  
863 *coefficients are shown for target disappearance (solid), and reappearance (dotted) around a)*  
864 *PFI, and b) catch periods. For PFI, we show the mean correlation value obtained after*  
865 *downsampling PFI events to 24 (the maximum number of catch periods), over 100 repetitions*  
866 *of this downsampling procedure. Asterisks denote the time points with significantly different*  
867 *correlation coefficients between PFI disappearances vs reappearances (paired t-tests, cluster*  
868 *corrected). Shading reflects the SEM across subjects corrected for within-subject*  
869 *comparisons (Cousineau, 2005).*

870

871

872

873

874

## Discussion

875

876

877

878

879

880

881

882

883

884

### *Multi-target PFI to track changes in conscious perception*

885

886

887

888

889

890

891

892

893

894

895

896

897

898

899

900

901

902

903

904

905

906

907

908

909

910

911

912

913

914

915

916

We embarked to combine a multi-target perceptual filling-in (PFI) paradigm with frequency-tagged EEG. This combination has revealed novel insights into the mechanisms of PFI phenomena including unexpected asymmetric neural correlates for disappearances and reappearances with respect to its relation with the amount of PFI (Figure 8) and spatiotemporal distinctions between steady-state visual evoked potential (SSVEP) harmonics (1f and 2f background responses, Figure 10 and 11). Here, we discuss these findings focusing on several advantages of our experimental paradigm.

Frequency-tagging has been used to study the neural correlates of consciousness, mainly in combination with binocular rivalry (Brown & Norcia, 1997; Jamison et al., 2015; Katyal, Engel, He, & He, 2016; Sutoyo & Srinivasan, 2009; TONIoni et al., 1998; Zhang et al., 2011). When reporting on perceptual reversals in these paradigms, neural activity that is associated with purely perceptual processes has been entangled with the processes of attention and the act of report (Aru, Bachmann, Singer, & Melloni, 2012; Miller, 2007; Tsuchiya, Wilke, Frässle, & Lamme, 2015; van Boxtel et al., 2010; van Boxtel & Tsuchiya, 2015). To reduce these confounds, replays with the physical removal or alternation of stimuli have been used as a standard control condition to compare with, for example, genuine perceptual switches in binocular rivalry (Frassle, Sommer, Jansen, Naber, & Einhäuser, 2014; Lumer, Friston, & Rees, 1998). As the requirements for both perceptual and physical reversals involve attention and report, it was hoped that contrasting these conditions would isolate the neural processes specific to endogenously generated changes in consciousness. Despite various attempts, generating catch movies (or the physical replays) that perceptually match endogenously-generated conscious changes in perception remains a significant challenge, due to highly complex phenomenal dynamics during rivalry (Knapen, Brascamp, Pearson, van Ee, & Blake, 2011; Wilson, Blake, & Lee, 2001). Until these report-related attentional confounds are resolved, results from such experiments, particularly binocular rivalry, need to be interpreted with caution (Blake, Brascamp, & Heeger, 2014; Frassle et al., 2014; Naber, Frässle, & Einhäuser, 2011).

Unlike binocular rivalry, perceptual changes during PFI are crisp and simple, suggesting PFI can prove to be a useful psychophysical tool to study the NCC. The simplicity of PFI phenomenology allowed us to 1) generate catch events that were difficult to distinguish from real PFI ([see Movie 1](#)), and 2) to ask untrained participants to accurately and simultaneously report on multiple targets, while allowing us to check the quality of their report. Equipped with this technical advancement, we observed a facilitation of simultaneous target disappearances and reappearances, strongly implying long-range interactions between the distant targets.

The multi-target display also allowed us to have a more objective graded measure of differences in the contents of consciousness (i.e., the amount of PFI), which revealed an asymmetry between the neural correlates of disappearances and reappearances. At this point,

917 we have no straightforward explanation for this. One possible explanation is the difference in  
918 saliency between PFI disappearances and reappearances, as reappearances can be predicted  
919 with higher spatial and temporal accuracy than disappearances. Increased spatial accuracy  
920 follows from the fact that reappearances can only occur at locations where a target has  
921 already disappeared moments prior. As the duration of PFI is also short compared to the 60-  
922 second trial (Figure 7), reappearances can also be predicted with greater temporal accuracy  
923 than multi-target disappearances. Thus, PFI disappearances may be more unexpected than  
924 reappearances, enhancing their subjective saliency. Indeed, greater phasic pupil responses to  
925 target disappearances than reappearances have been reported in motion-induced blindness  
926 (Kloosterman et al., 2015; Thomas et al., 2017) which may be closely related to PFI  
927 (Devyatko, Appelbaum, & Mitroff, 2016; Hsu, Yeh, & Kramer, 2004, 2006; New & Scholl,  
928 2008). This difference in spatiotemporal saliency might have resulted in the asymmetric  
929 patterns of log SNR based on the number of disappearing or reappearing targets (Figure 8).  
930 To better understand the mechanisms of this asymmetry, further studies employing a  
931 paradigm that feature multi-target and graded conscious perception will be necessary.

932

933

### 934 *Insights into PFI mechanisms*

935

936 Our results are relevant to two popular models of PFI. The first is an isomorphic  
937 model. This model proposes the primary substrate of PFI as neurons in early retinotopic areas  
938 corresponding to target regions, which are activated via neurons corresponding to target  
939 surrounds through lateral connections (De Weerd et al., 1995; Pessoa et al., 1998). The model  
940 specifically proposes a two-stage process, where the first stage of seconds-long boundary  
941 adaptation is followed by a second stage of near instantaneous interpolation of the target  
942 location by surrounding visual features (Spillmann & De Weerd, 2003). The second is a  
943 symbolic model, whereby filling-in occurs when the visual system ignores an absence of  
944 information (Dennett, 1991; Kingdom & Moulden, 1988; O' Regan, 1992). In this model, the  
945 phenomenon of filling-in is realized at a (possibly higher) representational level, whereby a  
946 region devoid of information is symbolically labelled as 'more of the same' background, and  
947 thus is rendered invisible.

948 Our results favour the isomorphic model, but not exclusively. We found a slow,  
949 seconds-long increase in the background-related SNR prior to PFI events, consistent with  
950 previous electrophysiological data that showed increased spike rates in regions responding to  
951 a filled-in pattern in monkeys (De Weerd et al., 1995). Importantly, De Weerd et al.'s (1995)  
952 single-unit study did not supply behavioral reports, which we provide on an event-by-event  
953 manner, showing an increase in background SNR which precedes PFI events in humans, in  
954 support of the isomorphic model.

955 On the other hand, the symbolic model that suggests that filling-in happens in higher-  
956 level visual areas (Pessoa et al., 1998) is consistent with our behavioral findings. We  
957 observed a synergistic effect among spatially distant targets, which implies the involvement  
958 of neurons that have a larger receptive fields, typically found only in higher-level visual  
959 areas (Dumoulin & Wandell, 2008; Yoshor, Bosking, Ghose, & Maunsell, 2007). This across-  
960 quadrant facilitatory interaction extends a previous report of within-quadrant interactions



961 during PFI (De Weerd et al., 1998, experiment 4). More specifically, this synergistic PFI  
962 across quadrants may point to a mechanism that facilitates perceptual grouping.

963 Grouping may also interact with attentional mechanisms. Indeed, attending to  
964 shared features such as temporal modulation has been shown to enhance the binding of  
965 distributed visual regions into a perceptual group (Alais, Blake, & Lee, 1998). As attending to  
966 shared features such as colour (Lou, 1999) or shape (De Weerd et al., 2006) increases the  
967 disappearance of peripherally presented targets, fluctuations in attention to the targets as a  
968 group may also have impacted on multiple-locations synergistically. Alternatively, the  
969 simultaneous disappearance of multiple targets could be due to random fluctuations of the  
970 brain's response to the background (potentially also modulated by attention). Since the  
971 background surrounds all targets, a temporary increase in response could affect the visibility  
972 of all targets simultaneously.

973 Overall, our results are not compatible with the view that PFI is a phenomenon that  
974 results purely due to local adaptation processes in the retinal or low-level visual areas. Instead  
975 our results are compatible with the view that both retinotopic and contextual influences,  
976 possibly through lateral connections, determine the dynamics of PFI (Sasaki, 2007).

977

### 978 *Spatiotemporal profiles of 1f and 2f background SSVEP are distinct*

979

980 Another insight that arose from our application of SSVEP to study PFI regards the  
981 difference in spatiotemporal profiles of 1f and 2f responses (Figure 10 and 11). This  
982 difference was specifically modulated around the time of PFI. In the literature, 1f and 2f are  
983 traditionally considered to be similar, as they are dictated by the same stimulus input (Norcia  
984 et al., 2015). Recently, this assumption has been challenged by the finding of an attentional  
985 modulation of 2f, but not 1f, with concomitant changes in hemispheric lateralization for the  
986 topography of SSVEP responses ((Kim et al., 2011; Kim & Verghese, 2012). While an  
987 increased spatial distribution of 2f compared to 1f is consistent with our results where 1f was  
988 strongest over mid-occipital sites and 2f extended laterally (Figure 5), the flicker stimuli used  
989 in our experiments differ from those studies that optimized differentiating 1f from 2f (Kim et  
990 al., 2011). Thus extending this interpretation to our findings should be done with caution, but  
991 the temporal advantage of the 2f crossover compared to the 1f crossover would be consistent  
992 with a covert attentional modulation of 2f that instigates a perceptual change.

993

### 994 *Conclusions*

995 Here we extend efforts to refine NCC paradigms, by using PFI. Unlike traditional  
996 stimuli, PFI has the advantage that perceptual changes can be easily mimicked physically,  
997 and that participants can accurately report on multiple changes in consciousness occurring in  
998 close temporal proximity without much training. While genuine PFI and physical catch  
999 periods were phenomenally similar, we revealed significant differences in their respective  
1000 neural substrates through our SNR reconstruction analysis, and suggest that these differences  
1001 are due to the presence of competitive mechanisms supporting perceptual disappearances, but  
1002 not physical disappearances. Future studies that succeed in tagging both targets and surrounds  
1003 in PFI would be able to investigate the nature of this competition. They may also reveal why  
1004 there are significant differences in the dependence on the amount of PFI for disappearances,

1005 but not reappearances, which we have tentatively linked to differences in the level of  
1006 expectation and saliency. These are intriguing empirical questions to be resolved in the future  
1007 by capitalizing upon the peculiar effect that attention increases PFI (De Weerd et al., 2006;  
1008 Lou, 1999) and/or by utilizing SSVEP-based no-report paradigms (Tsuchiya, Wilke, Frassle,  
1009 & Lamme, 2015). We hope that our approach that combines under-utilized PFI with SSVEP  
1010 techniques will inspire various novel designs to address this central question in cognitive  
1011 neuroscience: the neural basis of attention and consciousness.

1012

1013

1014

## References

1015

- 1016 Alais, D., Blake, R., & Lee, S.-H. (1998). Visual features that vary together over time group  
1017 together over space. *Nature Neuroscience*, *1*(2), 160.
- 1018 Andersen, S. K., Hillyard, S. A., & Müller, M. M. (2008). Attention Facilitates Multiple  
1019 Stimulus Features in Parallel in Human Visual Cortex. *Current Biology*, *18*(13), 1006–  
1020 1009. <http://doi.org/10.1016/j.cub.2008.06.030>
- 1021 Aru, J., Bachmann, T., Singer, W., & Melloni, L. (2012). Distilling the neural correlates of  
1022 consciousness. *Neuroscience and Biobehavioral Reviews*, *36*(2), 737–746.  
1023 <http://doi.org/10.1016/j.neubiorev.2011.12.003>
- 1024 Benjamini, Y., Krieger, A. M., & Yekutieli, D. (2006). Adaptive linear step-up procedures  
1025 that control the false discovery rate. *Biometrika*, *93*(3), 491–507. Retrieved from  
1026 <https://pdfs.semanticscholar.org/7155/80a7be4c1945b2ab608bd43dd4f718587643.pdf>
- 1027 Benjamini, Y., & Yekutieli, D. (2001). The Control of the False Discovery Rate in Multiple  
1028 Testing under Dependency. *The Annals of Statistics*, *29*(4), 1165–1188.
- 1029 Blake, R., Brascamp, J., & Heeger, D. J. (2014). Can binocular rivalry reveal neural  
1030 correlates of consciousness? *Philosophical Transactions of the Royal Society of London.*  
1031 *Series B, Biological Sciences*, *369*(1641), 20130211.  
1032 <http://doi.org/10.1098/rstb.2013.0211>
- 1033 Bokil, H., Andrews, P., Kulkarni, J. E., Mehta, S., & Mitra, P. P. (2010). Chronux: A  
1034 platform for analyzing neural signals. *Journal of Neuroscience Methods*, *192*(1), 146–  
1035 151. <http://doi.org/10.1016/j.jneumeth.2010.06.020>
- 1036 Bonnef, Y. S., Donner, T. H., Cooperman, A., Heeger, D. J., & Sagi, D. (2013). Motion-  
1037 induced Blindness and Troxler Fading: Common and Different Mechanisms, *9*(3).  
1038 <http://doi.org/10.1371/journal.pone.0092894>
- 1039 Brown, R. J., & Norcia, A. M. (1997). A method for investigating binocular rivalry in real-  
1040 time with the steady-state VEP. *Vision Research*, *37*(17), 2401–2408.  
1041 [http://doi.org/10.1016/S0042-6989\(97\)00045-X](http://doi.org/10.1016/S0042-6989(97)00045-X)
- 1042 Cohen, M. X., & Gulbinaite, R. (2017). Rhythmic entrainment source separation: Optimizing  
1043 analyses of neural responses to rhythmic sensory stimulation. *NeuroImage*, 70862.  
1044 <http://doi.org/10.1101/070862>
- 1045 Cousineau, D. (2005). Confidence intervals in within-subject designs: A simpler solution to  
1046 Loftus and Masson's method. *Tutorials in Quantitative Methods for Psychology*, *1*(1),  
1047 42–45. <http://doi.org/no DOI found>
- 1048 Davidson, M. J., Alais, D., van Boxtel, J. J. A., & Tsuchiya, N. (2018). Attention periodically  
1049 samples competing stimuli during binocular rivalry. *eLife*, *7*, 137–155.  
1050 <http://doi.org/10.7554/eLife.40868>
- 1051 De Weerd, P., Desimone, R., & Ungerleider, L. G. (1998). Perceptual filling-in: A parametric  
1052 study. *Vision Research*, *38*(18), 2721–2734. <http://doi.org/10.1016/S0042->

- 1053 6989(97)00432-X
- 1054 De Weerd, P., Gattass, R., Desimone, R., & Ungerleider, L. G. (1995). Responses of cells in  
1055 monkey visual cortex during Perceptual filling-in of an artificial scotoma. *Nature*, *377*,  
1056 731–734.
- 1057 De Weerd, P., Smith, E., & Greenberg, P. (2006). Effects of selective attention on perceptual  
1058 filling-in. *Journal of Cognitive Neuroscience*, *18*(3), 335–347.  
1059 <http://doi.org/10.1162/jocn.2006.18.3.335>
- 1060 Delorme, A., & Makeig, S. (2004). EEGLAB: an open source toolbox for analysis of single-  
1061 trial EEG dynamics. *Journal of Neuroscience Methods*, *13*, 9–21.  
1062 <http://doi.org/http://dx.doi.org/10.1016/j.jneumeth.2003.10.009>
- 1063 Dennett, D. C. (1991). *Consciousness Explained*. Boston (Little, Brown and Co) 1991.
- 1064 Devyatko, D., Appelbaum, L. G., & Mitroff, S. R. (2016). A Common Mechanism for  
1065 Perceptual Reversals in Motion-Induced Blindness, the Troxler Effect, and Perceptual  
1066 Filling-In. *Perception*. <http://doi.org/10.1177/0301006616672577>
- 1067 Donner, T. H., Sagi, D., Bonneh, Y. S., & Heeger, D. J. (2008). Opposite neural signatures of  
1068 motion-induced blindness in human dorsal and ventral visual cortex. *The Journal of  
1069 Neuroscience* □: *The Official Journal of the Society for Neuroscience*, *28*(41), 10298–  
1070 10310. <http://doi.org/10.1523/JNEUROSCI.2371-08.2008>
- 1071 Dumoulin, S. O., & Wandell, B. A. (2008). Population receptive field estimates in human  
1072 visual cortex. *NeuroImage*, *39*(2), 647–660.  
1073 <http://doi.org/10.1016/j.neuroimage.2007.09.034>
- 1074 Durgin, F. H., Srimant, T. P., & Levi, D. M. (1995). On the filling in of the visual blind spot:  
1075 some rules of thumb. *Perception*, *24*(7), 827–840. <http://doi.org/10.1068/p240827>
- 1076 Frassle, S., Sommer, J., Jansen, A., Naber, M., & Einhauser, W. (2014). Binocular Rivalry:  
1077 Frontal Activity Relates to Introspection and Action But Not to Perception. *Journal of  
1078 Neuroscience*, *34*(5), 1738–1747. <http://doi.org/10.1523/JNEUROSCI.4403-13.2014>
- 1079 Fujiwara, M., Ding, C., Kaunitz, L., Stout, J. C., Thyagarajan, D., & Tsuchiya, N. (2017).  
1080 Optokinetic nystagmus reflects perceptual directions in the onset binocular rivalry in  
1081 Parkinson’s disease. *PLoS ONE*, *12*(3), 1–22.  
1082 <http://doi.org/10.1371/journal.pone.0173707>
- 1083 Gassel, M. M., & Williams, D. (1963). Visual function in patients with homonymous  
1084 hemianopia. *Brain*, *86*(2), 229–260.
- 1085 Gerrits, H. J., & Timmerman, G. J. (1969). The filling-in process in patients with retinal  
1086 scotomata. *Vision Research*, *9*(3), 439–442.
- 1087 Glover, S., & Dixon, P. (2004). Likelihood ratios: A simple and flexible statistic for empirical  
1088 psychologists. *Psychonomic Bulletin & Review*, *11*(5), 791–806.
- 1089 Harris, K. D., & Thiele, A. (2011). Cortical state and attention. *Nature Reviews  
1090 Neuroscience*, *12*(9), 509–523. <http://doi.org/10.1038/nrn3084>
- 1091 Hsu, L.-C., Yeh, S.-L., & Kramer, P. (2004). Linking motion-induced blindness to perceptual  
1092 filling-in. *Vision Research*, *44*(24), 2857–2866.
- 1093 Hsu, L.-C., Yeh, S. L., & Kramer, P. (2006). A common mechanism for perceptual filling-in  
1094 and motion-induced blindness. *Vision Research*, *46*(12), 1973–1981.  
1095 <http://doi.org/10.1016/j.visres.2005.11.004>
- 1096 Jamison, K. W., Roy, A. V., He, S., Engel, S. A., & He, B. (2015). SSVEP signatures of  
1097 binocular rivalry during simultaneous EEG and fMRI. *Journal of Neuroscience  
1098 Methods*, *243*, 53–62.
- 1099 Katyal, S., Engel, S. A., He, B., & He, S. (2016). Neurons that detect interocular conflict  
1100 during binocular rivalry revealed with EEG. *Journal of Vision*, *16*(3), 18.  
1101 <http://doi.org/10.1167/16.3.18>
- 1102 Kim, Y.-J., Grabowecky, M., Paller, K. a, Muthu, K., & Suzuki, S. (2007). Attention induces

- 1103       synchronization-based response gain in steady-state visual evoked potentials. *Nature*  
1104       *Neuroscience*, 10(1), 117–125. <http://doi.org/10.1038/nn1821>
- 1105       Kim, Y.-J., Grabowecky, M., Paller, K. a, & Suzuki, S. (2011). Differential roles of  
1106       frequency-following and frequency-doubling visual responses revealed by evoked neural  
1107       harmonics. *Journal of Cognitive Neuroscience*, 23(8), 1875–86.  
1108       <http://doi.org/10.1162/jocn.2010.21536>
- 1109       Kim, Y.-J., & Verghese, P. (2012). The Selectivity of Task-Dependent Attention Varies with  
1110       Surrounding Context. *Journal of Neuroscience*, 32(35), 12180–12191.  
1111       <http://doi.org/10.1523/JNEUROSCI.5992-11.2012>
- 1112       Kingdom, F., & Moulden, B. (1988). Border effects on brightness: A review of findings,  
1113       models and issues. *Spatial Vision*, 3(4), 225–262.
- 1114       Kloosterman, N. A., Meindertsma, T., van Loon, A. M., Lamme, V. A. F., Bonnef, Y. S., &  
1115       Donner, T. H. (2015). Pupil size tracks perceptual content and surprise. *European*  
1116       *Journal of Neuroscience*, 41(8), 1068–1078. <http://doi.org/10.1111/ejn.12859>
- 1117       Knapen, T., Brascamp, J., Pearson, J., van Ee, R., & Blake, R. (2011). The role of frontal and  
1118       parietal brain areas in bistable perception. *The Journal of Neuroscience* □: *The Official*  
1119       *Journal of the Society for Neuroscience*, 31(28), 10293–301.  
1120       <http://doi.org/10.1523/JNEUROSCI.1727-11.2011>
- 1121       Koch, C., & Tsuchiya, N. (2007). Attention and consciousness: two distinct brain processes.  
1122       *Trends in Cognitive Sciences*, 11(1), 16–22. <http://doi.org/10.1016/j.tics.2006.10.012>
- 1123       Komatsu, H. (2006). The neural mechanisms of perceptual filling-in. *Nature Reviews*.  
1124       *Neuroscience*, 7(3), 220–31. <http://doi.org/10.1038/nrn1869>
- 1125       Komatsu, H., Kinoshita, M., & Murakami, I. (2000). Neural responses in the retinotopic  
1126       representation of the blind spot in the macaque V1 to stimuli for perceptual filling-in.  
1127       *The Journal of Neuroscience* □: *The Official Journal of the Society for Neuroscience*,  
1128       20(24), 9310–9. <http://doi.org/20/24/9310> [pii]
- 1129       Lansing, R. W. (1964). Electroencephalographic Correlates of Binocular Rivalry in Man.  
1130       *Science (New York, N.Y.)*, 146(August), 1325–1327.  
1131       <http://doi.org/10.1126/science.146.3649.1325>
- 1132       Ling, S., & Carrasco, M. (2006). When sustained attention impairs perception. *Nature*  
1133       *Neuroscience*, 9(10), 1243–1245. <http://doi.org/10.1038/nn1761>
- 1134       Logothetis, N. K. (1998). Single units and conscious vision. *Philosophical Transactions of*  
1135       *the Royal Society of London. Series B, Biological Sciences*, 353(1377), 1801–1818.  
1136       <http://doi.org/10.1098/rstb.1998.0333>
- 1137       Lou, L. (1999). Selective peripheral fading: Evidence for inhibitory sensory effect of  
1138       attention. *Perception*, 28(4), 519–526. <http://doi.org/10.1068/p2816>
- 1139       Lumer, E. D., Friston, K. J., & Rees, G. (1998). Neural Correlates of Perceptual Rivalry in  
1140       the Human Brain. *Science*, 280(5371), 1930–1934.  
1141       <http://doi.org/10.1126/science.280.5371.1930>
- 1142       Maris, E., & Oostenveld, R. (2007). Nonparametric statistical testing of EEG- and MEG-data.  
1143       *Journal of Neuroscience Methods*, 164(1), 177–190.  
1144       <http://doi.org/10.1016/j.jneumeth.2007.03.024>
- 1145       Martinez-Conde, S., Macknik, S. L., Troncoso, X. G., & Dyar, T. a. (2006). Microsaccades  
1146       counteract visual fading during fixation. *Neuron*, 49(2), 297–305.  
1147       <http://doi.org/10.1016/j.neuron.2005.11.033>
- 1148       McEwen, C., Paton, B., Tsuchiya, N., & van Boxtel, J. J. A. (2018). Motion-induced  
1149       Blindness as a Tool to Measure Attentional Biases and the Link to Attention-  
1150       deficit/hyperactivity Traits.
- 1151       Meng, M., Remus, D. A., & Tong, F. (2005). Filling-in of visual phantoms in the human  
1152       brain. *Nature Neuroscience*, 8(9), 1248–54. <http://doi.org/10.1038/nn1518>



- 1153 Miller, S. M. (2007). On the correlation/constitution distinction problem (and other hard  
1154 problems) in the scientific study of consciousness. *Acta Neuropsychiatrica*, *19*(3), 159–  
1155 176. <http://doi.org/10.1111/j.1601-5215.2007.00207.x>
- 1156 Müller, M. M., Andersen, S., Trujillo, N. J., Valdes-Sosa, P., Malinowski, P., & Hillyard, S.  
1157 A. (2006). Feature-selective attention enhances color signals in early visual areas of the  
1158 human brain. *Proceedings of the National Academy of Sciences*, *103*(38), 14250–14254.
- 1159 Müller, M. M., Picton, T. W., Valdes-Sosa, P., Riera, J., Teder-Sälejärvi, W. A., & Hillyard,  
1160 S. A. (1998). Effects of spatial selective attention on the steady-state visual evoked  
1161 potential in the 20-28 Hz range. *Cognitive Brain Research*, *6*(4), 249–261.  
1162 [http://doi.org/10.1016/S0926-6410\(97\)00036-0](http://doi.org/10.1016/S0926-6410(97)00036-0)
- 1163 Müller, M. M., Teder-Sälejärvi, W. A., & Hillyard, S. (1998). The time course of cortical  
1164 facilitation during cued shifts of spatial attention. *Nature Neuroscience*, *1*(7), 631–634.
- 1165 Naber, M., Frässle, S., & Einhäuser, W. (2011). Perceptual Rivalry: Reflexes Reveal the  
1166 Gradual Nature of Visual Awareness. *PLoS ONE*, *6*(6), e20910.  
1167 <http://doi.org/10.1371/journal.pone.0020910>
- 1168 New, J. J., & Scholl, B. J. (2008). “Perceptual scotomas”: A functional account of motion-  
1169 induced blindness: Research article. *Psychological Science*, *19*(7), 653–659.  
1170 <http://doi.org/10.1111/j.1467-9280.2008.02139.x>
- 1171 Norcia, A. M., Appelbaum, L. G., Ales, J. M., Cottareau, B. R., & Rossion, B. (2015). The  
1172 steady-state visual evoked potential in vision research: A review. *Journal of Vision*,  
1173 *15*(6), 1–46. <http://doi.org/10.1167/15.6.4>
- 1174 O’Regan, J. K. (1992). Solving the Real Mysteries of Visual-Perception - the World as an  
1175 Outside Memory. *Canadian Journal of Psychology-Revue Canadienne De Psychologie*,  
1176 *46*(3), 461–488.
- 1177 Pessoa, L., Thompson, E., & Noë, A. (1998). Finding out about filling-in: a guide to  
1178 perceptual completion for visual science and the philosophy of perception. *The*  
1179 *Behavioral and Brain Sciences*, *21*(6), 723–48–802.  
1180 <http://doi.org/10.1017/S0140525X98001757>
- 1181 Pinheiro, J., Bates, D., DebRoy, S., & Sarkar, D. (2014). Linear and nonlinear mixed effects  
1182 models. *R Package Version*, *3*.
- 1183 Polonsky, A., Blake, R., Braun, J., & Heeger, D. J. (2000). Neuronal activity in human  
1184 primary visual cortex correlates with perception during binocular rivalry. *Nature*  
1185 *Neuroscience*, *3*(11), 1153.
- 1186 Ramachandran, V. S., & Gregory, R. L. (1991). Perceptual filling in of artificially induced  
1187 scotomas in human vision. *Nature*, *350*(6320), 699–702.
- 1188 Reynolds, J. H., & Pasternak, T. (2000). Attention Increases Sensitivity of V4 Neurons  
1189 increases the magnitude of the neuronal response elic. *Neuron*, *26*, 703–714.  
1190 [http://doi.org/10.1016/S0896-6273\(00\)81206-4](http://doi.org/10.1016/S0896-6273(00)81206-4)
- 1191 Safran, A. B., & Landis, T. (1996). Plasticity in the adult visual cortex: implications for the  
1192 diagnosis of visual field defects and visual rehabilitation. *Current Opinion in*  
1193 *Ophthalmology*, *7*(6), 53–64.
- 1194 Sasaki, Y. (2007). Processing local signals into global patterns. *Current Opinion in*  
1195 *Neurobiology*, *17*(2), 132–139. <http://doi.org/10.1016/j.conb.2007.03.003>
- 1196 Schieting, S., & Spillman, L. (1987). Flicker adaptation in the peripheral retina. *Vision*  
1197 *Research*, *27*(2), 277–284.
- 1198 Spillmann, L., & De Weerd, P. (2003). Mechanisms of surface completion: Perceptual filling-  
1199 in of texture. *Filling-in: From Perceptual Completion to Cortical Reorganization*, 81–  
1200 105.
- 1201 Spillmann, L., Otte, T., Hamburger, K., & Magnussen, S. (2006). Perceptual filling-in from  
1202 the edge of the blind spot. *Vision Research*, *46*(25), 4252–4257.



- 1203 <http://doi.org/10.1016/j.visres.2006.08.033>
- 1204 Spitzer, H., Desimone, R., & Moran, J. (2016). Increased Attention Enhances Both  
1205 Behavioral and Neuronal Performance Author ( s ): Hedva Spitzer , Robert Desimone  
1206 and Jeffrey Moran Published by □ : American Association for the Advancement of  
1207 Science Stable URL □ : <http://www.jstor.org/stable/1701607> Acces, 240(4850), 338–340.
- 1208 Stürzel, F., & Spillmann, L. (2001). Texture fading correlates with stimulus salience. *Vision*  
1209 *Research*, 41(23), 2969–2977. [http://doi.org/10.1016/S0042-6989\(01\)00172-9](http://doi.org/10.1016/S0042-6989(01)00172-9)
- 1210 Sutoyo, D., & Srinivasan, R. (2009). Nonlinear SSVEP responses are sensitive to the  
1211 perceptual binding of visual hemifields during conventional “eye” rivalry and  
1212 interocular “percept” rivalry. *Brain Research*, 1251, 245–255.  
1213 <http://doi.org/10.1016/j.brainres.2008.09.086>
- 1214 Thomas, V., Davidson, M., Zakavi, P., Tsuchiya, N., & van Boxtel, J. J. A. (2017). Simulated  
1215 forward and backward self motion, based on realistic parameters, causes motion induced  
1216 blindness. *Scientific Reports*, 7(1), 1–14. <http://doi.org/10.1038/s41598-017-09424-6>
- 1217 Tononi, G., & Edelman, G. M. (1998). Consciousness and complexity. *Science (New York,*  
1218 *N.Y.)*, 282(5395), 1846–1851. <http://doi.org/10.1126/science.282.5395.1846>
- 1219 Tononi, G., Srinivasan, R., Russell, D. P., & Edelman, G. M. (1998). Investigating neural  
1220 correlates of conscious perception by frequency-tagged neuromagnetic responses.  
1221 *Proceedings of the National Academy of Sciences*, 95(6), 3198–3203.  
1222 <http://doi.org/10.1073/pnas.95.6.3198>
- 1223 Tsuchiya, N., & Koch, C. (2015). The relationship between consciousness and top-down  
1224 attention. In S. Laureys, O. Gosseries, & G. Tononi, G. (Eds). *The neurology of*  
1225 *consciousness: cognitive neuroscience and neuropathology* (pp. 71–86). Academic  
1226 Press.
- 1227 Tsuchiya, N., Wilke, M., Frassle, S., & Lamme, V. (2015). No-report paradigms: Extracting  
1228 the true neural correlates of consciousness. *TICS*.  
1229 <http://doi.org/10.1017/CBO9781107415324.004>
- 1230 Tsuchiya, N., Wilke, M., Frässle, S., & Lamme, V. A. F. (2015). No-Report Paradigms:  
1231 Extracting the True Neural Correlates of Consciousness. *Trends in Cognitive Sciences*,  
1232 19(12), 757–770. <http://doi.org/10.1016/j.tics.2015.10.002>
- 1233 van Boxtel, J. J. A., Tsuchiya, N., & Koch, C. (2010). Consciousness and Attention: On  
1234 Sufficiency and Necessity. *Frontiers in Psychology*, 1(DEC), 1–13.  
1235 <http://doi.org/10.3389/fpsyg.2010.00217>
- 1236 Vialatte, F. B., Maurice, M., Dauwels, J., & Cichocki, A. (2010). Steady-state visually  
1237 evoked potentials: Focus on essential paradigms and future perspectives. *Progress in*  
1238 *Neurobiology*, 90(4), 418–438. <http://doi.org/10.1016/j.pneurobio.2009.11.005>
- 1239 Wagemans, J., Elder, J. H., Kubovy, M., Palmer, S. E., Peterson, M. A., Singh, M., & von der  
1240 Heydt, R. (2012). A century of Gestalt psychology in visual perception: I. Perceptual  
1241 grouping and figure–ground organization. *Psychological Bulletin*, 138(6), 1172–1217.  
1242 <http://doi.org/10.1037/a0029333>
- 1243 Watanabe, M., Cheng, K., Murayama, Y., Ueno, K., Asamizuya, T., Tanaka, K., &  
1244 Logothetis, N. (2011). Attention but not awareness modulates the BOLD signal in the  
1245 human V1 during binocular suppression. *Science*, 334(6057), 829–831.
- 1246 Weil, R. S., Kilner, J. M., Haynes, J. D., & Rees, G. (2007). Neural correlates of perceptual  
1247 filling-in of an artificial scotoma in humans. *Proceedings of the National Academy of*  
1248 *Sciences of the United States of America*, 104(12), 5211–5216.  
1249 <http://doi.org/10.1073/pnas.0609294104>
- 1250 Weil, R. S., & Rees, G. (2011). A new taxonomy for perceptual filling-in. *Brain Research*  
1251 *Reviews*, 67(1–2), 40–55. <http://doi.org/10.1016/j.brainresrev.2010.10.004>
- 1252 Weil, R. S., Wykes, V., Carmel, D., & Rees, G. (2012). Opposite effects of perceptual and

- 1253 working memory load on perceptual filling-in of an artificial scotoma. *Cognitive*  
1254 *Neuroscience*, 3(1), 36–44. <http://doi.org/10.1080/17588928.2011.603829>
- 1255 Wilson, H. R., Blake, R., & Lee, S.-H. (2001). Dynamics of travelling waves in visual  
1256 perception. *Nature*, 412(6850), 907.
- 1257 Winter, B. (2013). Linear models and linear mixed effects models in R with linguistic  
1258 applications. *arXiv Preprint arXiv:1308.5499*.
- 1259 Yoshor, D., Bosking, W. H., Ghose, G. M., & Maunsell, J. H. R. (2007). Receptive fields in  
1260 human visual cortex mapped with surface electrodes. *Cerebral Cortex*, 17(10), 2293–  
1261 2302. <http://doi.org/10.1093/cercor/bhl138>
- 1262 Zhang, P., Jamison, K., Engel, S., He, B., & He, S. (2011). Binocular Rivalry Requires Visual  
1263 Attention. *Neuron*, 71(2), 362–369. <http://doi.org/10.1016/j.neuron.2011.05.035>
- 1264  
1265  
1266
